# Supplementary material
Source: PubMed Central journal article supplement (PMC6001373)
Supplement: develop-145-153619-s1.pdf [file develop-145-153619-s1.pdf]

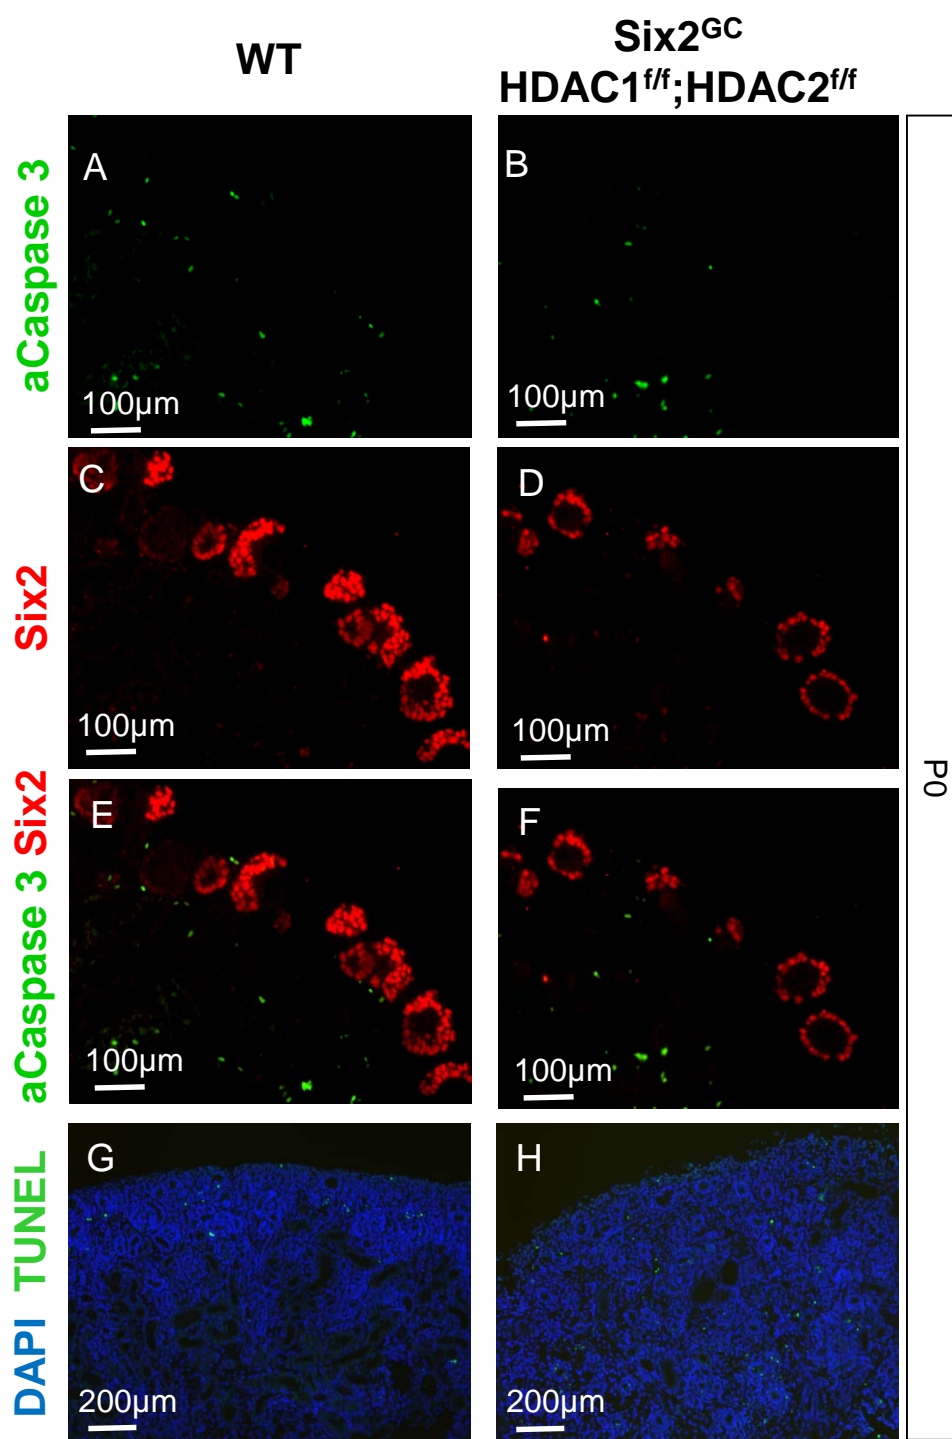

**Supplementary Figure 1. NPC-specific deletion of HDAC1 and HDAC2 has no effect on cell apoptosis.** Section immunofluorescence for active caspase 3 (A-F) or TUNEL assay (G, H). Although the NPC mass is reduced in size (C-F), there is no evidence of increased apoptosis in the *Six2*<sup>+</sup> cap mesenchyme. Original Magnification X20 (A-F), X10 (G,H).

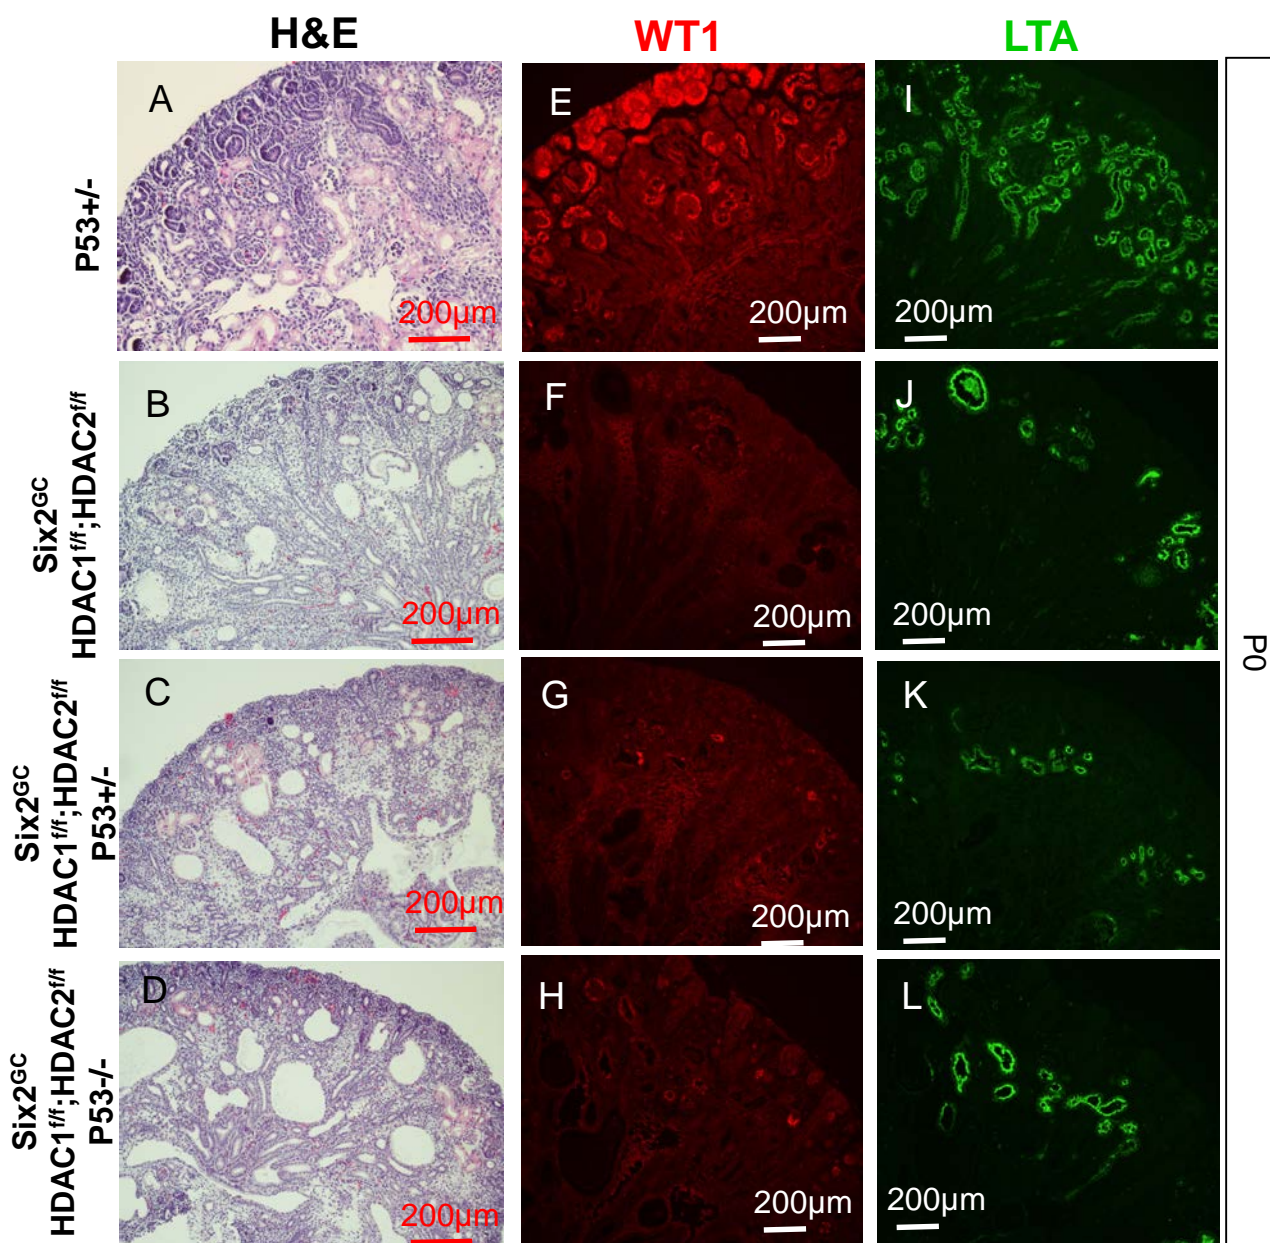

**Supplementary Figure 2. p53 gene deletion fails to rescue the renal dysgenesis in mice with NPC-specific deletion of HDAC1/2.** H&E staining (A-D) and immunofluorescence for WT1 (marker of CM and glomeruli, and LTA, a marker of differentiating proximal tubules. (B, F, J) NPC-specific deletion of HDAC1/2 causes loss of WT1 and proximal tubules. (C, D, G, H, K, L) Deletion of one or two p53 alleles fails to rescue nephrogenesis or cyst formation. Original Magnification X10

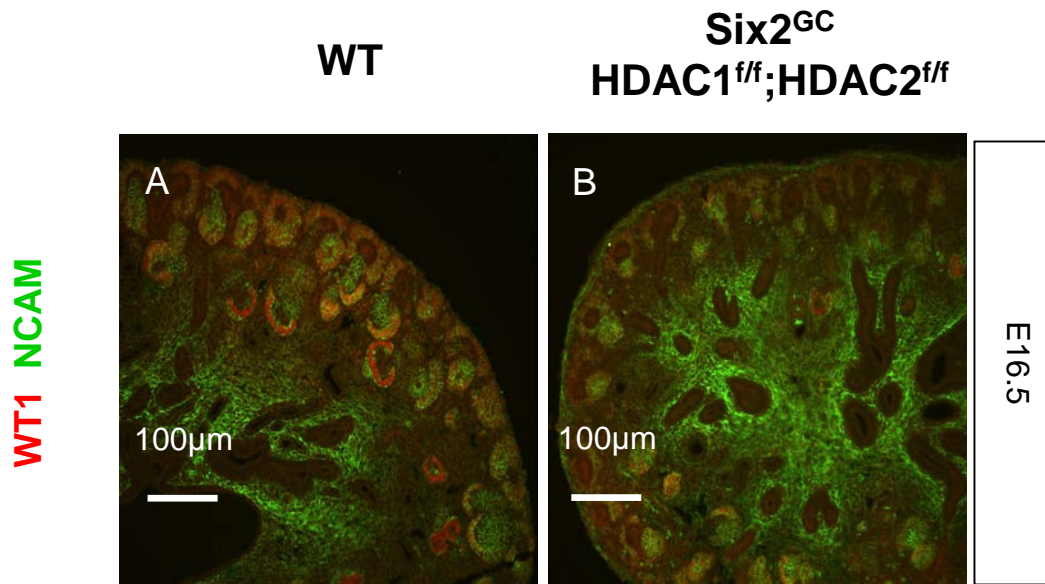

Supplementary Figure 3. NPC-specific deletion of HDAC1 and HDAC2 reduces the expression of WT1 in the cap mesenchyme. NCAM: neural cell adhesion molecule.

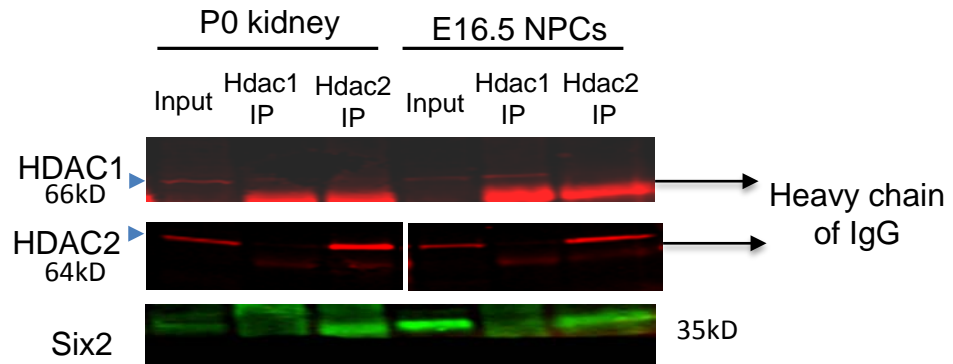

Supplementary Fig 4. Endogenous interaction between Six2 with HDAC1 and HDAC2 was detected in P0 kidneys and E16.5 NPCs

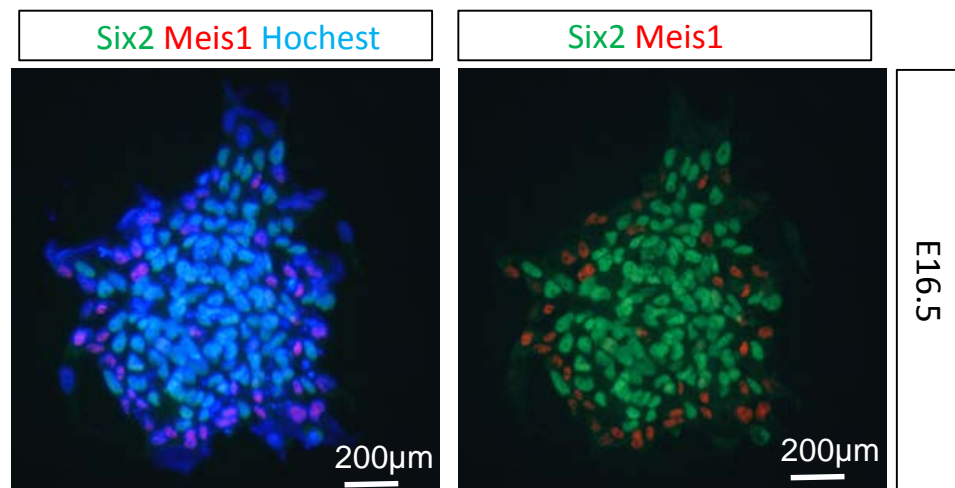

Supplementary Fig 5 Isolated Six2+/Cited1+ NPCs from E16.5 kidneys by magnetic activated cell sorting. The isolated NPCs are highly enriched with Six2 (90%) with minor contamination with stromal cells (Meis1).

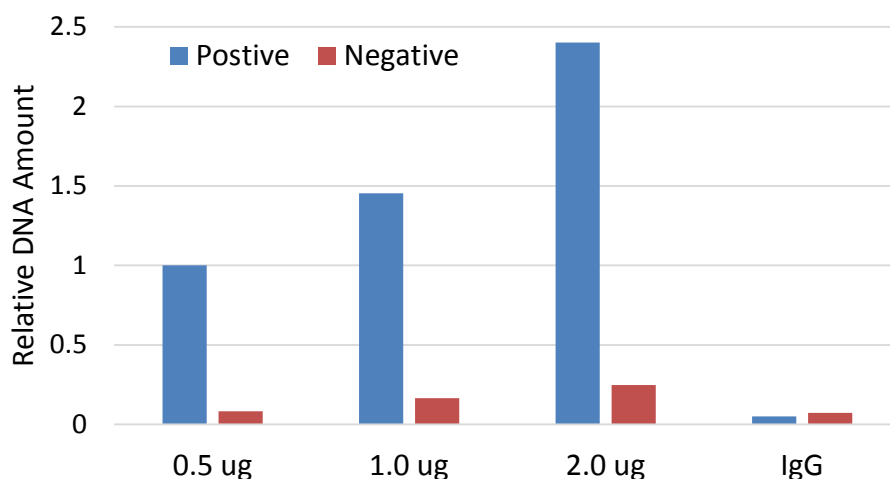

Supplementary Fig 6 Validation of HDAC1 ChIP by qPCR. ChIP assays were performed on 3.75 millions cells per IP (immunoprecipitation) using different amount of Hdac1 antibody (0.5  $\mu$ g, 1.0  $\mu$ g, and 2.0  $\mu$ g). An IP with a control isotype (IgG) was also performed in parallel (1  $\mu$ g/IP). After the IP, the ChIP DNA was analyzed by qPCR to evaluate the specificity of the reaction. Mouse Positive Control Primer Set Actb-2 (Active Motif 71017) was used to amplify HDAC1-bound DNA as positive control and mouse Negative control Primer Set 1 (Active Motif 71011) was used as a negative control region.



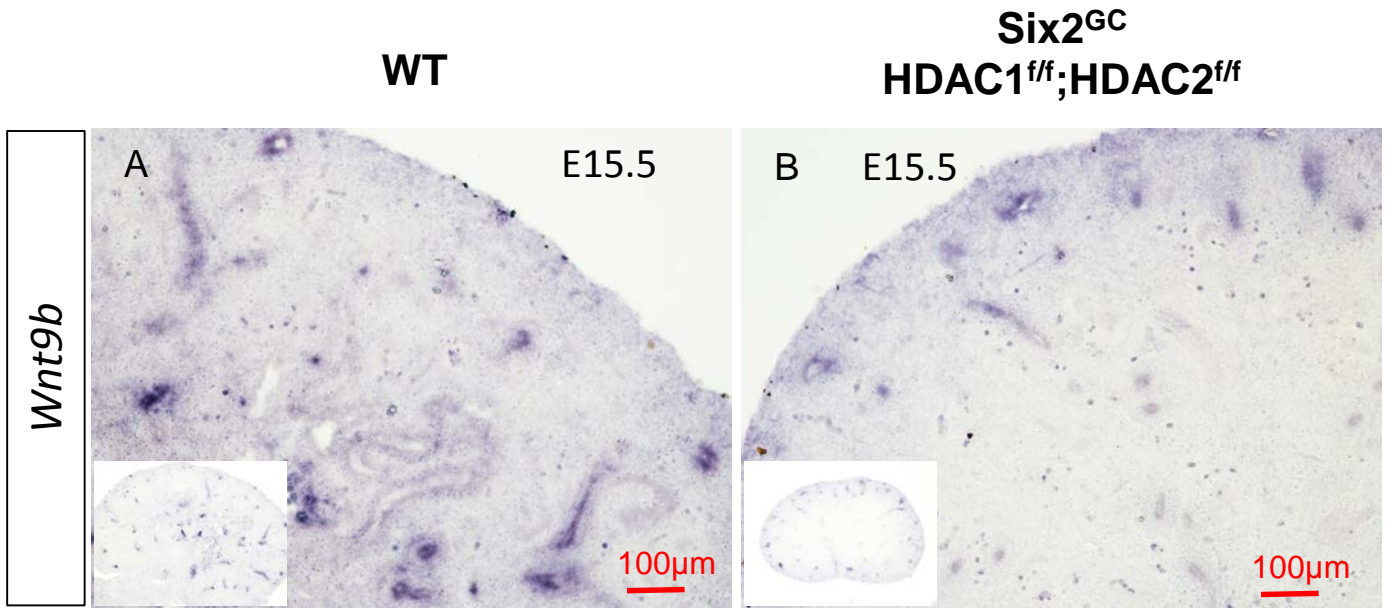

**Supplementary Figure 7. Ureteric bud *Wnt9b* expression is not affected by NPC-specific deletion of HDAC1/2.** Section in situ hybridization at P0. In wild-type kidneys (A), *Wnt9b* expression is observed in the UB trunks. This spatial pattern and the intensity of staining are unaltered by loss of HDAC1/2 in NPC (B). Original magnification X10.

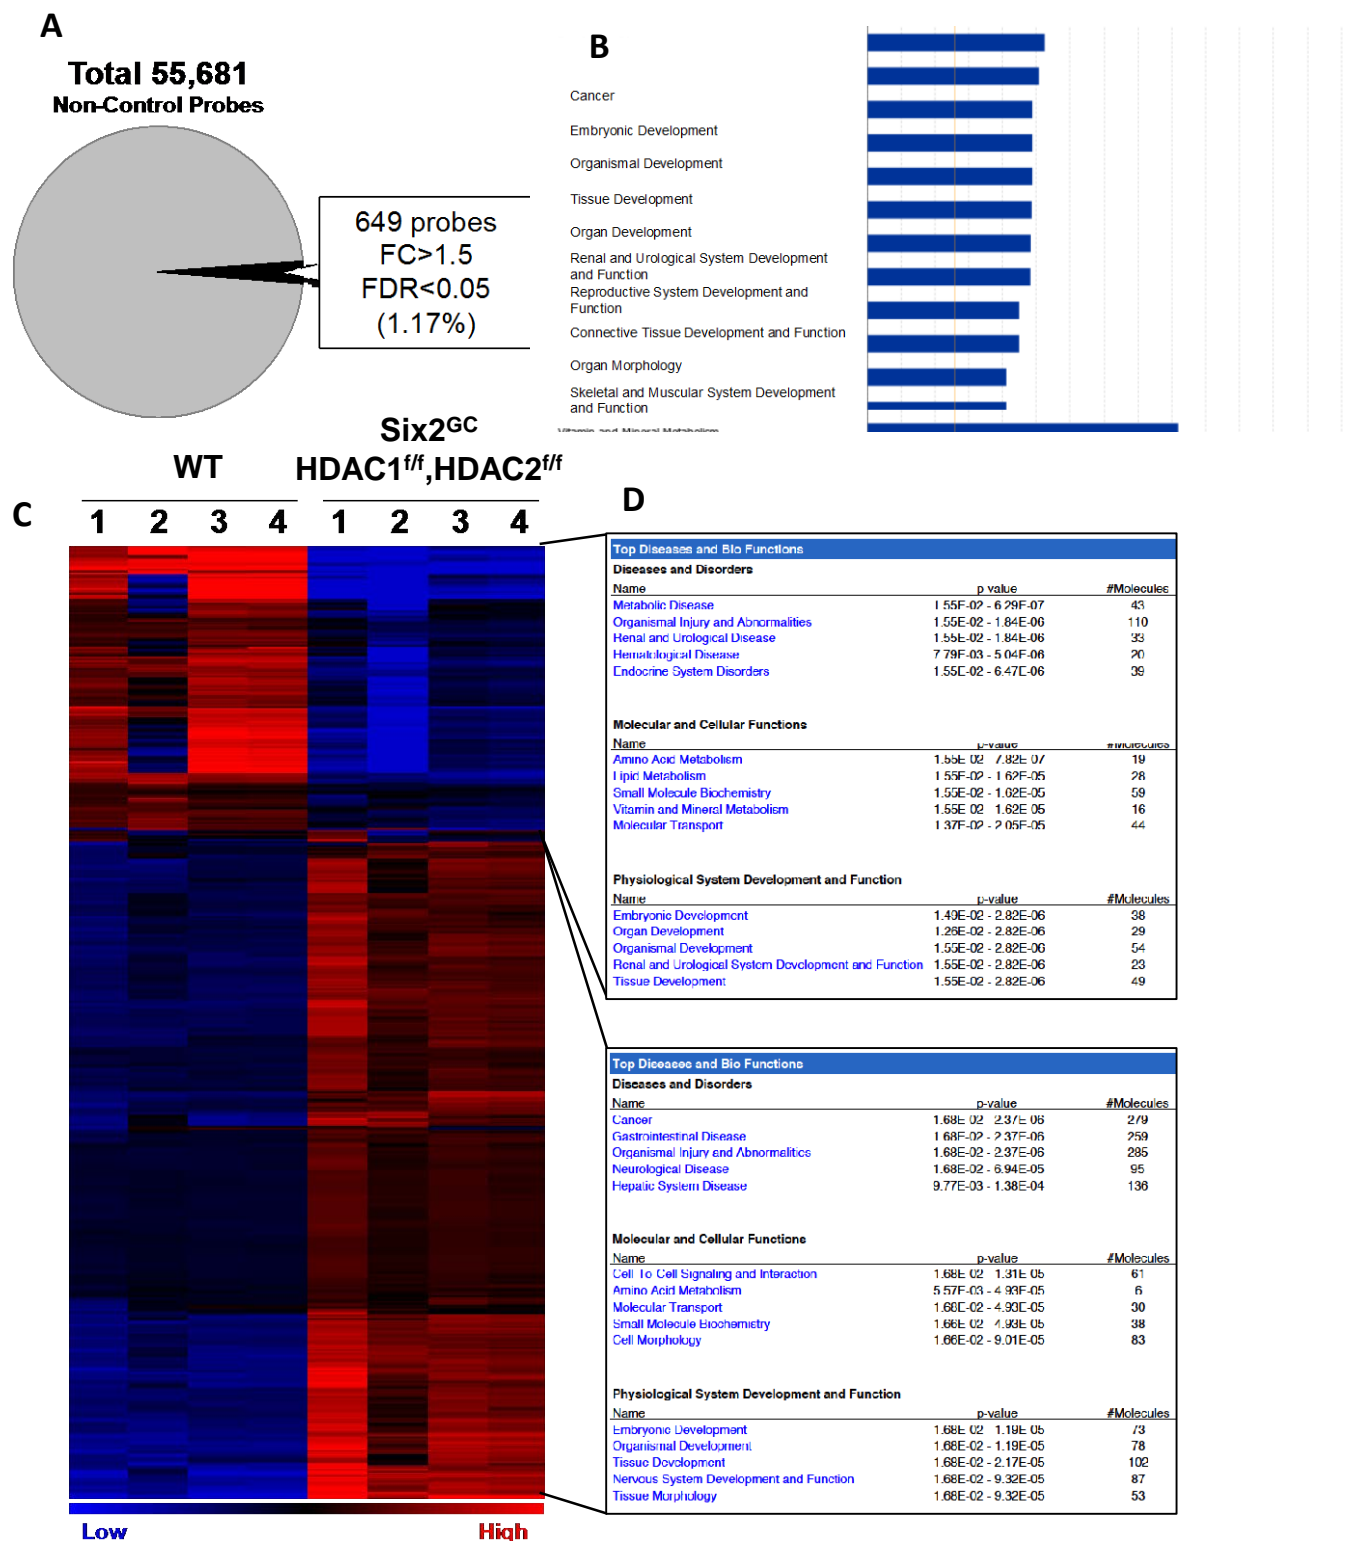

**Supplementary Figure 8. Transcriptome profiling of total kidney RNA from E15.5 wild-type and *Six2<sup>GC</sup>;HDAC<sup>ff</sup>,HDAC2<sup>ff</sup>* kidneys.** (A) About 1% of the total transcriptome is altered in the NPC-specific HDAC1/2 mutant kidneys. (B) Top 10 biological processes affected as identified by Ingenuity Pathway Analysis. (C) Heatmap analysis of the differentially expressed. (D) Top diseases, molecular and cellular functions and physiological functions either up-regulated (red) and down-regulated (blue) in wild-type vs. HDAC1/2 mutant kidneys (N=4 separate experiments per group).



Table S1. A complete list of genes for each category and pathway

© 2000-2015 QIAGEN. All rights reserved.

| Symbol             | Fold Change    | Synonym(s)                                                                                                                                  |
|--------------------|----------------|---------------------------------------------------------------------------------------------------------------------------------------------|
| 1700047117Rik2/Far | 1.663          | 1700047117Rik, 1700047117Rik1, 1700047117Rik2, C14orf24, D730001C10Rik, Fam177a, Fc                                                         |
| 1700110101Rik      | 1.693          | 1700016F01Rik, Gm2938, RIKEN cDNA 1700110101 gene, RP23-3881I2.4                                                                            |
| 2310002F09Rik      | 1.640          | RIKEN cDNA 2310002F09 gene                                                                                                                  |
| 2310015B20Rik      | -2.642         | RIKEN cDNA 2310015B20 gene                                                                                                                  |
| 3830612M24         | 2.094          | uncharacterized protein 3830612M24                                                                                                          |
| 4732423E21Rik      | 1.632          | AL024288, RIKEN cDNA 4732423E21 gene                                                                                                        |
| 4930412013Rik      | 1.594          | ENSMUSG00000075535, Gm10853, RIKEN cDNA 4930412013 gene                                                                                     |
| 4930432E11Rik/493  | -2.136         | 4930432E11Rik, 4932431P20Rik, LOC100504864, RIKEN cDNA 4930432E11 gene, RIKEN c                                                             |
| 4933427D06Rik      | 1.631          | proline rich 20E, Pr20e, RIKEN cDNA 4933427D06 gene                                                                                         |
| 6720422M22Rik      | 1.550          | BB143565, RIKEN cDNA 6720422M22 gene                                                                                                        |
| 8030425K09Rik      | 2.257          | RIKEN cDNA 8030425K09 gene                                                                                                                  |
| 9030419F21Rik      | 1.666          | RIKEN cDNA 9030419F21 gene                                                                                                                  |
| 9030619P08Rik      | -2.707         | lymphocyte antigen 6 complex pseudogene                                                                                                     |
| 9130020K20Rik      | 1.657          | RIKEN cDNA 9130020K20 gene                                                                                                                  |
| 9530083O12Rik      | 1.799          | RIKEN cDNA 9530083O12 gene                                                                                                                  |
| 9630010G10Rik      | 1.907          | RIKEN cDNA 9630010G10 gene                                                                                                                  |
| A230065H16Rik      | -1.651         | Gm898, Lbh2, RGD1560608, RIKEN cDNA A230065H16 gene, similar to novel protein                                                               |
| A530006G24Rik      | 1.652          | Gm1003, RIKEN cDNA A530006G24 gene, RP23-18D24.3                                                                                            |
| ACOT11             | 1.874          | 1110020M10Rik, 2010309H15Rik, acyl-CoA thioesterase 11, AW060409, BFIT, BFIT1, mKIAA                                                        |
| ACOX3              | 1.562          | acyl-CoA oxidase 3, pristanoyl, acyl-Coenzyme A oxidase 3, pristanoyl, B1685180, EST-s59, F                                                 |
| <b>ACSM2A</b>      | <b>-4.857</b>  | <b>A-923A4.1, ACSM2, acyl-CoA synthetase medium-chain family member 2, acyl-CoA synthetase</b>                                              |
| ACSS2              | 1.517          | 1110017C11Rik, ACAS, Acas1, ACAS2, ACECS, AceCS1, Acetyl-coa synthetase 1, amp form                                                         |
| ADAMTS17           | 1.597          | a disintegrin-like and metalloproteinase (reprolysin type) with thrombospondin type 1 motif, 17,                                            |
| ADAMTS7            | 1.570          | a disintegrin-like and metalloproteinase (reprolysin type) with thrombospondin type 1 motif, 7,                                             |
| AFP                | -3.811         | AFPD, Alpha fetoprotein, FETA, Fetoprotein $\alpha$ , HPAPF, $\alpha$ foetoprotein, $\alpha$ -1-fetoprotein, $\alpha$ -fetop                |
| <b>AKR1C3</b>      | <b>-12.402</b> | <b>17-beta HSD5, 17-<math>\beta</math> HSD5, 20-alpha-hydroxysteroid dehydrogenase, 20-<math>\alpha</math>-hydroxysteroid de</b>            |
| ALDH1A2            | 1.505          | aldehyde dehydrogenase 1 family, member A2, aldehyde dehydrogenase family 1, subfamily 1,                                                   |
| ALDH1A3            | 1.885          | aldehyde dehydrogenase 1 family, member A3, aldehyde dehydrogenase family 1, subfamily 1,                                                   |
| <b>ALDOB</b>       | <b>-4.673</b>  | <b>ALDB, ALDO2, aldolase B, fructose-bisphosphate, BC016435, Fructose Bisphosphatase Aldc</b>                                               |
| AMN                | -2.875         | 5033428N14Rik, amnion associated transmembrane protein, amnionless, AV002116, PRO10                                                         |
| ANKH               | -1.682         | ANK, ANKH inorganic pyrophosphate transport regulator, CCAL2, CMDJ, CPPDD, D15Ert22                                                         |
| <b>ANXA13</b>      | <b>-4.114</b>  | <b>1810034H17Rik, annexin A13, ANX13, AV055219, ISA</b>                                                                                     |
| APLP1              | 1.583          | amyloid beta (A4) precursor-like protein 1, amyloid $\beta$ (A4) precursor-like protein 1, APLP, APLP                                       |
| ARHGAP26           | 1.591          | 1810044B20Rik, 2610010G17Rik, 4933432P15RIK, A1853435, GRAF, GRAF1, GTPASE RE                                                               |
| ARHGEF15           | 1.679          | ARGEF15, D130071N09, D530030K12Rik, E5, Ephexin5, Rho guanine nucleotide exchange                                                           |
| ARL6IP6            | 1.709          | 2310057C01Rik, 2610529A11Rik, ADP-ribosylation factor-like 6 interacting protein 6, AIP-6, A                                                |
| ARRB1              | 1.542          | 1200006117RIK, ARB1, ARR1, Arr2, ARRBeta1, Arrestin 2, Arrestin $\beta$ 1, arrestin, beta 1, arres                                          |
| ART4               | -1.632         | 4432404K01Rik, ADP-ribosyltransferase 4, ADP-ribosyltransferase 4 (Dombrock blood group),                                                   |
| ASB9               | -3.489         | 1700011M07Rik, ankyrin repeat and SOCS box-containing 9, LOC100364446, LOC684606, F                                                         |
| ASIC4              | 2.312          | ACCN4, acid-sensing (proton-gated) ion channel family member 4, BNAC4, Spasic                                                               |
| ASPG               | 1.769          | A530050D06Rik, A1429460, asparaginase, asparaginase homolog (S. cerevisiae), C14orf76,                                                      |
| ASS1               | -1.500         | AA408052, ARGININOSUCCINATE SYNTHASE, argininosuccinate synthase 1, argininosucci                                                           |
| ATP1B1             | -2.041         | ATP1B, Atp4b, ATPase, Na <sup>+</sup> /K <sup>+</sup> transporting, beta 1 polypeptide, ATPase, Na <sup>+</sup> /K <sup>+</sup> transportin |
| ATP6V0E2           | -1.561         | 0610006O14Rik, ATP6V0E2L, ATPase, H <sup>+</sup> transporting V0 subunit e2, ATPase, H <sup>+</sup> transporti                              |
| ATXN7              | 1.714          | A430107N12RIK, ADCAII, A1627028, ATAXIN-7, OPCA3, RGD1562692, SCA7                                                                          |
| AW011956           | 1.544          | expressed sequence AW011956, W51672                                                                                                         |
| AW549542           | 1.773          | expressed sequence AW549542                                                                                                                 |
| BACH2              | 1.610          | BTB and CNC homology 1, basic leucine zipper transcription factor 2, BTB and CNC homolo                                                     |
| BDH1               | 1.583          | 2310032J20Rik, 3-HYDROXYBUTYRATE DEHYDROGENASE, 3-hydroxybutyrate dehydrog                                                                  |
| BEND4              | 1.677          | BEN domain containing 4, CCDC4, D330027G24Rik, EG666938, LOC100365335, LOC6872                                                              |
| BP1FC              | 1.726          | 4732454E24, BPI fold containing family C, BPIL2, RP1-149A16.10-011                                                                          |
| BRINP1             | 1.523          | bone morphogenetic protein/retinoic acid inducible neural-specific 1, bone morphogenic prote                                                |
| <b>BSND</b>        | <b>-3.010</b>  | <b>BART, Bartter syndrome, infantile, with sensorineural deafness (Barttin), BARTTIN, barttin CL</b>                                        |
| BTN1A1             | 1.702          | BOS 21855, BT, BTN, BTN1, Butyrophilin, subfamily 1, member a1, RP23-16H24.3                                                                |
| C10orf35           | -1.535         | 2010107G23Rik, AA545165, chromosome 10 open reading frame 35, hypothetical protein LO                                                       |
| C12orf73           | -1.687         | 1190007I07Rik, chromosome 12 open reading frame 73, hypothetical protein LOC691921, LC                                                      |
| C1orf54            | 1.584          | BC028528, cDNA sequence BC028528, chromosome 1 open reading frame 54, L259, RP4-7                                                           |
| C2                 | -1.806         | ARM14, C3/c5 convertase, CFB isoform 1, CO2, complement component 2, complement cc                                                          |
| C230096K16Rik      | 1.547          | RIKEN cDNA C230096K16 gene                                                                                                                  |
| C5AR2              | 1.987          | C5L2, complement component 5a receptor 2, E030029A11RIK, GPF77, GPR77                                                                       |
| C9orf16            | 1.690          | 1110008P14Rik, C79326, chromosome 9 open reading frame 16, EST00098, LOC10036543C                                                           |
| CA4                | -2.337         | AW456718, CAIV, CAR4, carbonic anhydrase 4, Carbonic anhydrase IV, RP17, RP23-167D6.                                                        |
| CALB1              | 1.662          | Brain-2, Cabp-d28k, CaBP28k, Cad28k, CALB, calbindin 1, calbindin 1, 28kDa, CALBINDIN I                                                     |
| CALML4             | -1.519         | 2010002G05Rik, Calmodulin related, Calmodulin-like 4, LOC686783, MGC4809, NY-BR-20                                                          |
| CALN1              | 1.558          | 9630012C17Rik, CABP8, calneuron 1, MNcb-0849                                                                                                |
| CAMKK1             | 1.503          | 4732414G09Rik, A1846603, calcium/calmodulin-dependent protein kinase kinase 1, alpha, ca                                                    |
| CANP6              | -1.888         | calpain 6, CalpM, CANPX, CAPNX, DJ914P14.1, RP23-462G16.1                                                                                   |
| CCDC138            | 1.690          | 6230424H07Rik, BC042726, coiled-coil domain containing 138, FLJ32745, RGD1566050                                                            |
| CDC42EP5           | 1.506          | 1700027J19Rik, 2010007O02Rik, Borg3, C85526, CDC42 effector protein (Rho GTPase bind                                                        |
| CDH6               | -1.772         | CAD6, cadherin 6, type 2, K-cadherin, cadherin 6, type 2, K-cadherin (fetal kidney), cadherin                                               |

|                      |                |                                                                                                      |
|----------------------|----------------|------------------------------------------------------------------------------------------------------|
| CDK5R1               | 1.515          | CDK5P35, CDK5R, CDK5R1 p35, CDK5R1/ p35, cyclin-dependent kinase 5, regulatory subu                  |
| CDKL1                | -1.771         | 4933411O17Rik, cyclin-dependent kinase-like 1 (CDC2-related kinase), KKIALLRE, P42                   |
| CELF4                | 1.950          | A230070D14Rik, Brui4, BRUNOL-4, C130060B05Rik, CUGBP, Elav-like family member 4, LfI                 |
| CEP170B              | 1.735          | AI466840, AW555464, centrosomal protein 170B, CEP170R, FAM68C, KIAA0284, mKIAA028                    |
| CGREF1               | -1.509         | 1110004G24Rik, AW045201, cell growth regulator with EF-hand domain 1, CGR11                          |
| CHMP4B               | 1.536          | 2010012F05RIK, C20orf178, C76846, charged multivesicular body protein 4B, CHMP4A, Chr                |
| CHPF2                | 1.728          | 2010209O12Rik, AW060945, chondroitin polymerizing factor 2, CHONDROITIN SULFATE GL                   |
| CHST8                | -1.514         | 1500011J21Rik, AI426009, carbohydrate (N-acetylgalactosamine 4-0) sulfotransferase 8, Gal            |
| <b>CIDEA</b>         | <b>-10.261</b> | <b>AW212747, cell death-inducing DFFA-like effector a, cell death-inducing DNA fragmentation f</b>   |
| CIDEB                | -1.978         | 1110030C18Rik, AI790179, cell death-inducing DFFA-like effector b, cell death-inducing DNA           |
| <b>CITED1</b>        | <b>-6.359</b>  | <b>AI316840, AU019144, Cbp/p300-interacting transactivator with Glu/Asp-rich carboxy-terminal</b>    |
| <b>CLCNKA</b>        | <b>-3.543</b>  | <b>C75963, chloride channel Kb, chloride channel, voltage-sensitive Ka, chloride channel, voltag</b> |
| CLEC18B              | -1.842         | C-type lectin domain family 18, member A, C-type lectin domain family 18, member B, Clec18           |
| CLIC6                | -1.718         | 5730466J16RIK, AL022908, AW045520, chloride intracellular channel 6, CLIC1L, CLIC6B                  |
| COL1A1               | 1.551          | alpha 1 (I) PROCOLLAGEN, alpha 1 (I) COLLAGEN, Alpha1 type i collagen, Alpha1 Type I Pr              |
| COL26A1              | 1.567          | 9430032K24Rik, BC002218, Col26a, Collagen Type26, collagen, type XXVI, alpha 1, collager             |
| COL2A1               | 2.047          | ANFH, AOM, CG2A1A, COL11A3, COL2, Col2a, Collagen type II, Collagen type ii alpha, Collager          |
| COL4A6               | 1.890          | BB116301, collagen, type IV, alpha 6, collagen, type IV, alpha 6, CXDELq22.3, DELXq22.3, DFN         |
| COL5A1               | 1.504          | AI413331, Collagen type v alpha1, collagen, type V, alpha 1, collagen, type V, alpha 1, RP11-263f    |
| COL7A1               | 1.593          | AW209154, Collagen type 7 alpha chain, Collagen type 7 alpha chain, collagen, type VII, alpha 1,     |
| COLQ                 | 2.184          | A130034K24RIK, collagen-like tail subunit (single strand of homotrimer) of asymmetric acetyl         |
| COX6B2               | 1.633          | 1700067P11Rik, BC048670, COXVIIB2, CT59, cytochrome c oxidase subunit VIb polypeptide                |
| CPA1                 | 2.073          | 0910001L12Rik, Carboxypeptidase A, Carboxypeptidase a1, carboxypeptidase A1 (pancreati               |
| CPA2                 | 1.593          | carboxypeptidase A2 (pancreatic), carboxypeptidase A2, pancreatic                                    |
| CPB2                 | -3.408         | 1110032P04Rik, 4930405E17Rik, AI255929, C5A-INACTIVATING FACTOR, carboxypeptidas                     |
| CPN1                 | -2.597         | 0610011F20RIK, CARBOXYPEPTIDASE N, carboxypeptidase N, polypeptide 1, CPN, LOC10                     |
| CRABP2               | 1.898          | AI893628, cellular retinoic acid binding protein 2, cellular retinoic acid binding protein II, CRAI  |
| CRB2                 | -1.919         | 5930402A21, BC043114, crumbs family member 2, crumbs homolog 2 (Drosophila), RGD130                  |
| CREB5                | 1.712          | cAMP responsive element binding protein 5, CRE-BPA, D430026C09Rik, LOC100910345, R                   |
| CRMP1                | 1.567          | collapsin response mediator protein 1, DPYSL1, DRP-1, Tuc-1a, ULIP-3                                 |
| CSPG5                | 1.530          | Caleb, chondroitin sulfate proteoglycan 5, chondroitin sulfate proteoglycan 5 (neuroglycan C),       |
| <b>CUBN</b>          | <b>-2.534</b>  | <b>AA408369, AL022750, cubilin (intrinsic factor-cobalamin receptor), CUBULIN, D2Wsu88e, GF</b>      |
| CYB561               | 1.548          | CYB561A1, Cytochrome b-561, FRRS2, RP23-186E14.2                                                     |
| CYB5R4               | -1.530         | 2810034J18Rik, B5+B5R, b5/b5r, b5b5r, C79736, cb5/cb5R, Cb5cb5r, cytochrome b5 reduct                |
| CYP26B1              | 2.050          | CP26, CYP26A2, cytochrome P450, family 26, subfamily B, polypeptide 1, P450 26A2, P450f              |
| Cyp2d26              | -4.223         | 1300006E06Rik, Cyp2d2, cytochrome P450, family 2, subfamily d, polypeptide 2, cytochrome             |
| CYP2U1               | 1.707          | 8430436A10Rik, cytochrome P450, family 2, subfamily U, polypeptide 1, P450TEC, SPG49, C              |
| CYP4A11              | -2.563         | AI647584, CP4Y, Cyp4a, Cyp4a1, Cyp4a10, CYP4A2, Cyp4a22, Cyp4a31, Cyp4a32, CYP4A                     |
| D230019N24Rik        | 1.563          | RIKEN cDNA D230019N24 gene                                                                           |
| D230040J21Rik        | 1.727          | RIKEN cDNA D230040J21 gene                                                                           |
| D430019H16Rik        | 1.527          | AI852661, LOC100909954, RIKEN cDNA D430019H16 gene, uncharacterized LOC10090995                      |
| D8Ert158e            | 1.960          | DNA segment, Chr 8, ERATO Doi 158, expressed                                                         |
| DAO                  | -2.668         | AI987963, D-Amino Acid Oxidase, DAAO, DAMOX, DAO1, DEAMINOACID OXIDASE, OXDA                         |
| DAPL1                | -2.311         | 2310032F03RIK, death associated protein-like 1, EEDA, RGD1309610, RP23-151F21.4                      |
| DCAF12L2             | 1.652          | A130007F10Rik, DDB1 and CUL4 associated factor 12-like 2, RGD1560768, RP11-13E5.1, F                 |
| DCX                  | -1.584         | DBCN, Dbct, DC, doublecortin, Lissencephalin-X, LISX, rCG 23159, RP23-462G16.2, RP5-9'               |
| DCXR                 | 1.601          | 0610038K04Rik, 1810027P18Rik, DCR, dicarbonyl L-xylulose reductase, dicarbonyl/L-xylulos             |
| DDC                  | 1.802          | AAAD, AADC, ADC, aromatic L-amino acid decarboxylase, Dihydroxyphenylalanine decarbox                |
| DENN4A               | 1.696          | AI115600, AI851943, DENN/MADD domain containing 4A, F730015K02Rik, IRLB, mCG 1454                    |
| DERA                 | 1.847          | 2-deoxyribose-5-phosphate aldolase homolog (C. elegans), 2010002D22RIK, 2500002K03Ri                 |
| DKK3                 | 1.649          | AW061014, C87148, DICKKOPF HOMOLOG 3, dickkopf homolog 3 (Xenopus laevis), dickko                    |
| DLGAP3               | 1.687          | BC058433, DAP-3, discs, large (Drosophila) homolog-associated protein 3, PRPL8, RP23-81              |
| DLK1                 | 1.607          | AW742678, delta, Delta-like 1 homolog, delta-like 1 homolog (Drosophila), Delta1, DLK, Dlk,          |
| <b>DLL1</b>          | <b>-2.180</b>  | <b>Delta, delta-like 1 (Drosophila), DELTA1, DL-1, UNQ146/PRO172</b>                                 |
| DMTN                 | 1.632          | AI325486, DEMATIN, dematin actin binding protein, DMT, EPB4.9, Epb4.9 predicted, EPB49,              |
| DNAJA4               | 1.749          | 1110021L12Rik, AV358213, Dj4, DnaJ (Hsp40) homolog, subfamily A, member 4, Hsj4, mmDj                |
| DNAJC19              | 1.570          | 1810055D05Rik, AA959924, DnaJ (Hsp40) homolog, subfamily C, member 19, DnaJ (Hsp40)                  |
| DNAJC22              | -2.144         | 2810451A06Rik, AI506245, DnaJ (Hsp40) homolog, subfamily C, member 22, RGD1311098,                   |
| DOCK5                | -1.635         | 1110060D06RIK, AI666732, AI956923, BC016533, dedicator of cytokinesis 5, E130320D18, L               |
| DPF1                 | 1.524          | BAF45b, D4, zinc and double PHD fingers family 1, NEUD4, neuro-d4                                    |
| DPP4                 | -1.975         | ADABP, ADCP2, Adenosine Deaminase Binding Protein, CD26, DDP4, Dipeptidyl Peptidase I                |
| DPYSL5               | 1.677          | CRAM, CRMP-5, dihydropyrimidinase-like 5, dihydropyrimidinase-related protein 5-like, DRP-           |
| Duxbl1 (includes oth | 1.807          | 1110051B16Rik, doubl homeobox B-like 2, double homeobox B-like 1, double homeobox B-li               |
| DYNC111              | -2.302         | DH IC-1, DIC, DNCI1, DNCIC1, dynein cytoplasmic 1 intermediate chain 1, dynein, cytoplasr            |
| Eda                  | 1.564          | ectodysplasin-A, Ed1, EDA1, HED, RGD1563178, RP23-281K21.1, Ta, tabby, XLHED                         |
| EGFR                 | 1.658          | 9030024J15RIK, AI552599, C-ERBB, EGF receptor, EGF-TK, EGFR VIII, EGFR1, epidermal t                 |
| EHMT1                | 1.560          | 9230102N17Rik, bA188C12.1, D330003E03, euchromatic histone methyltransferase 1, euchr                |
| Eif2s3y              | 1.647          | Eif-2gy, eukaryotic translation initiation factor 2, subunit 3, structural gene Y-linked, Spy, Tfy   |
| Eif5                 | 1.513          | E74-like factor 5, ESE-2, ESE-5, ESE-5., RP23-445A5.2                                                |
| EMILIN2              | 1.645          | elastin microfibril interfacier 2, FOAP-10                                                           |
| ENDOV                | 1.570          | A730011L01Rik, endonuclease V, FLJ35220, RP23-25M3.5                                                 |
| ENO2                 | 1.673          | AI837106, D6Ert375e, enolase 2 (gamma, neuronal), enolase 2 (gamma, neuronal), enolase 2, ga         |

|                     |        |                                                                                              |
|---------------------|--------|----------------------------------------------------------------------------------------------|
| ENPEP               | -1.710 | 6030431M22Rik, AMINOPEPTIDASE A, APA, Bp-1/6C3, CD249, Gamma-Glutamyl Peptidase              |
| EPB41L4B            | 1.890  | 6430543G08RIK, AA589614, AU021054, BB007528, CG1, D4Erd346e, EHM2, Epb4.114b, ei             |
| EPHA5               | 1.670  | AI854630, AW125296, bsk, CEK7, EHK-1, EK7, ELS1, Els1., EPH receptor A5, HEK7, Rek7,         |
| EPHB3               | 1.665  | AW456895, Cek10, Efnb3r, EPH receptor B3, ETK2, HEK2, MDK5, Sek4, TYRO6                      |
| EPHX1               | 1.900  | AI195553, Ehm, Eph-1, EPHX, EPOX, Epoxide Hydrolase, epoxide hydrolase 1, microsomal,        |
| EPS8                | -2.023 | AW261790, DFNB102, epidermal growth factor receptor pathway substrate 8                      |
| ESPN                | -1.651 | DFNB36, Espin, ESPN1, Je, LP2654, RP23-284C20.3                                              |
| ESRRG               | -1.897 | Err γ, ERR3, Errg, ERRG2, ERRgamma, estrogen-related receptor gamma, estrogen-related        |
| EXOC6               | -1.592 | 4833405E05Rik, AW413330, C430002C19, EXOC6A, exocyst complex component 6, hbd, m             |
| EXOSC9              | 1.665  | exosome component 9, p5, p6, PM/SCL-75, PMSCL1, Polymyositis/scleroderma autoantigen         |
| EYA1                | 1.709  | BOP, BOR, BOS1, EYA transcriptional coactivator and phosphatase 1, eyes absent 1 homolog     |
| FABP3               | -1.665 | BOS 2157, FABP, FABP11, Fabph-1, Fabph-4, fatty acid binding protein 3, muscle and heart,    |
| FAM160B2            | 1.637  | family with sequence similarity 160, member B2, FLJ11125, FP13191, G430067P06Rik, RAI1       |
| FAM219A             | 1.606  | 2310028H24Rik, bA573M23.5, C9orf25, family with sequence similarity 219, member A, LOC       |
| FBN1                | 1.854  | ACMICD, AI536462, B430209H23, BOS 10884, ECTOL1, FBN, Fib-1, Fibrillin-1, fibrillin 1, FN    |
| FBP1                | -1.983 | F1:6 biphosphatase, FBP, Fbp-2, FBP3, FBPase, Fdp, Fructose biphosphatase, fructose bisp     |
| FBXL16              | 1.812  | BC042620, C16ORF22, c380A1.1, F-box and leucine-rich repeat protein 16, Fbl16, MGC339,       |
| FBXL7               | 1.600  | AL023057, D230018M15RIK, F-box and leucine-rich repeat protein 7, FBL6, FBL7                 |
| FCHO1               | 1.552  | 3322402E17RIK, FCH domain only 1, N28152                                                     |
| FCHSD1              | 1.671  | A030002D08Rik, FCH and double SH3 domains 1, NWK2, UNQ737/PRO1431                            |
| FGF                 | -3.996 | 2510049G14Rik, Ab1-181, Ab1-216, Ac1-581, Beta fibrinogen, Fg beta chain, Fg β chain, Fibi   |
| FGF1                | -2.318 | ACIDIC FGF, AFGF, BOS 8269, Dfrrx, ECGF, ECGF-beta, ECGF-β, ECGFA, ECGFB, Fam, F             |
| FIG4                | 1.507  | A530089I17RIK, AI326867, ALS11, BTOP, CMT4J, dj24914.1, FIG4 homolog (S. cerevisiae), I      |
| FLRT1               | 2.664  | AW742165, D630040I23RIK, fibronectin leucine rich transmembrane protein 1, RGD1565152        |
| FLRT3               | 1.516  | 5530600M07RIK, C430047I10RIK, fibronectin leucine rich transmembrane protein 3, HH21, n      |
| FN1                 | 1.632  | BOS 2065, cFn, CIG, E330027I09, ED-B, FIBNEC, FIBRONECTIN 1, Fibronectin i, Fibronect        |
| FNBP1               | 1.582  | 1110057E06RIK, 2210010H06RIK, FBP1, FBP17, Formin binding, formin binding protein 1, R       |
| FOLR1               | -1.562 | FBP, FBP1, FOLATE binding, folate receptor 1 (adult), FOLATE receptor alpha, FOLATE rece     |
| FOXD1               | 1.540  | AI385632, BF-2, FKHL8, Forkhead box d1, FREAC-4, Hfh10, Hfhbf2, LOC684320                    |
| FOXL1               | -1.949 | 5830401E05Rik, FKHL10, FKHL10, forkhead box l1, FREAC-6, HFH-3, RP23-32J15.1                 |
| FOXO6               | 1.615  | forkhead box O6, LOC100131908, RP23-421C7.1                                                  |
| FOXP4               | 1.546  | 1200010K03RIK, 2310007G05RIK, FKHLA, forkhead box P4, hFKHLA, mFKHLA, RP11-328M              |
| FREM1               | 1.777  | BC037594, BNAR, C9orf143, C9orf145, C9orf154, crf11, D430009N09, D630008K06, eye<m           |
| FRMPD2              | 1.712  | ENSMUSG00000071536, FERM and PDZ domain containing 2, Gm1582, Gm626, PDZD5C,                 |
| FRZB                | 1.889  | BOS 1606, FRE, frezzled, FRITZ, frizzled-related protein, Frp, FRP-3, FRZB-1, FRZB-PEN, F    |
| FST                 | 2.337  | AL033346, D2MgJ51, FOL1, follistatin, Follistatin 288, FS, fs315, Fst-288, RATFOL1           |
| Fxyd2               | -2.433 | Atp1g1, FXYD domain-containing ion transport regulator 2, Na+ K+ Atpase γ Subunit            |
| FZD10               | 1.721  | CD350, frizzled class receptor 10, frizzled homolog 10 (Drosophila), FZ-10, Fzd10-ps1, FzE7, |
| GABRA3              | 1.514  | GABA A receptor alpha-3, Gaba A receptor subunit α 3, GABA A receptor α-3, gamma-aminot      |
| GAL                 | 1.786  | GAL-GMAP, galanin, galanin/GMAP prepropeptide, GALN, GLNN, GMAP                              |
| GARNL3              | 1.552  | AW120551, bA356B19.1, GTPase activating RANGAP domain-like 3, GTPase activating Rap          |
| GATSL2              | 1.626  | 7530428J21Rik, AW742413, Gats, GATS protein-like 2, GATSL1                                   |
| GC                  | -5.400 | DBP, DBP/GC, DBP02, GRD3, Group-specific Component, group-specific component (vitami         |
| GCNT1               | -5.315 | 5630400D21Rik, B130048E03, beta-1,6-N-ACETYLGALUCOSAMINYLTRANSFERASE, C2 G                   |
| GFRA2               | 1.525  | GDNF family receptor alpha 2, GDNF family receptor α 2, GDNF receptor alpha2, GDNFALP1       |
| GFRA3               | 1.569  | GDNF family receptor alpha 3, GDNF family receptor α 3, GDNFR3, GFRalpha3, glial cell line   |
| GGT1                | -2.234 | Alpha1-GGT, CD224, D22S672, D22S732, dwg, Gamma-glutamyl transpeptidase, gamma-glt           |
| GIPC2               | -1.692 | 2200002N01Rik, AU021850, GIPC PDZ domain containing family, member 2, SEMCAP-2               |
| GLA                 | 1.633  | agalsidase alfa, agalsidase beta, agalsidase β, Ags, alpha D-GALACTOSIDASE A, Alpha Gal      |
| Gm10576             | 1.666  | ENSMUSG000000073788, predicted gene 10576                                                    |
| Gm12258             | 1.551  | LOC100502966, OTTMUSG00000005767, predicted gene 12258, RP23-419P16.7                        |
| Gm21596/Hmgb1       | -2.005 | amphoterin, DEF, Gm21596, high mobility group box 1, high-mobility group (nonhistone chron   |
| Gm266               | -2.035 | DIRAS family, GTP-binding RAS-like 3, Diras3, predicted gene 266, RGD1565168                 |
| Gm5097/Gm8978       | 1.641  | EG329055, EG668106, Gm5097, Gm8978, predicted gene 5097, predicted gene 8978, RGD            |
| Gm5176              | -2.006 | EG382421, high mobility group box 2 pseudogene                                               |
| Gm6115              | -2.040 | EG619937, predicted gene 6115, RGD1563668, similar to High mobility group protein 1 (HMC     |
| Gm6213              | 1.653  | EG621335, predicted gene 6213                                                                |
| Gm6994              | 1.659  | EG629678, predicted gene 6994                                                                |
| Gm9780 (includes of | 1.857  | ENSMUSG000000043248, ENSMUSG000000072674, Gm10393, MGC41689, Plac9, Plac9a, F                |
| Gm9900              | 1.722  | ENSMUSG000000053218, predicted gene 9900                                                     |
| GNB5                | 1.638  | f1r, G protein beta 5, G protein β 5, GB5, Gbeta5, GBS, Guan nuc b5, guanine nucleotide bind |
| GNG7                | 1.551  | AI840417, FLJ00058, G protein binding protein, gamma7, G protein gamma 7, G protein γ 7,     |
| GPD1                | -1.991 | AI747587, Gdc-1, Glycerol-3-phosphate dehydrogenase, glycerol-3-phosphate dehydrogenas       |
| GRASP1              | 1.522  | 2210415K24Rik, 3110031O14Rik, C87852, G protein-coupled receptor associated sorting prc      |
| GRIA4               | 1.780  | Glua4, GLUR4, GLUR4C, Gluralpha4, GLURD, glutamate receptor, ionotropic, AMPA 4, gluta       |
| GSTA5               | -3.232 | ENSMUSG000000074179, glutathione S-transferase alpha 5, glutathione S-transferase α 5, gl    |
| GSTM5               | 1.703  | glutathione S-transferase mu 1, glutathione S-transferase mu 5, glutathione S-transferase, m |
| Gstm6               | 1.707  | glutathione S-transferase, mu 6, RGD1563391                                                  |
| GULP1               | 1.702  | 3110030A04Rik, 5730529O06Rik, CED-6, GULP, GULP, engulfment adaptor PTB domain cor           |
| GXYLT2              | 1.505  | GLT8D4, glucoside xylosyltransferase 2, Gm152, LOC100365223, LOC686935                       |
| H2-K2/H2-Q9         | 1.895  | EG630499, Gm7035, H-2K1, H-2K1K, H2-K2, H2-Q9, histocompatibility 2, K region locus 2, h     |
| H2-Q5               | 1.589  | histocompatibility 2, Q region locus 5, LOC100044874, Qa, Qa-5, Qat-5                        |

|                       |                                                                                                          |
|-----------------------|----------------------------------------------------------------------------------------------------------|
| HAGH                  | 1.605 BC019817, GLO2, Glutathione Hydrolase, GLX2, GLXII, Glyoxalase II, HAGH1, Hydroxyacyl              |
| HAP1                  | 1.621 HAP2, hHLP1, HIP5, HLP, huntingtin-associated protein 1, neuroan 1, RP23-39213.11-001              |
| HAS2                  | -1.645 hyaluronan synthase 2, Hyaluronan synthase homolog                                                |
| HDC                   | -3.550 AW108189, Hdc-a, Hdc-c, Hdc-e, Hdc-s, histidine decarboxylase, RP23-251E2.2                       |
| HDDC3                 | -1.956 (ppGpp)ase, 1110033009Rik, C86475, HD domain containing 3, MESH1, RGD1311839                      |
| HECW1                 | 1.656 9330116H24Rik, AV273951, BUL1, E130207119Rik, HECT, C2 and WW domain containing E                  |
| HEMGN                 | 1.697 4921524M03Rik, AI317176, CT155, EDAG, EDAG-1, EDAG2, haemogen, hemogen, Hgn, ml                    |
| HES5                  | -2.241 bHLHb38, hairy and enhancer of split 5 (Drosophila), hes family bHLH transcription factor 5, F    |
| HEY1                  | -1.678 AI316788, AI414254, BHLHb31, CHF2, hairy/enhancer-of-split related with YRPW motif 1, HE          |
| HHIP                  | 1.764 Hedgehog-interacting protein, Hhip1, HIP, HIP1, LOC100366089, RGD1564108, UNQ5825/P                |
| HLA-A                 | 1.923 0610037M15Rik, A-28, Aw-24, Aw-33, Aw-34, Aw-66, Aw-68, Aw-69, Aw-74, Aw-80, BE13676               |
| HLA-E                 | 1.599 37b, 37c, BM1, C920025E04Rik, DAMA-277114.1, EA1.2, EA2.1, H2-Qa1, H2-T11, H2-T23, I               |
| HMP19                 | 1.631 HMP19 protein, neuron specific gene family member 2, Neurospecific gene family membrane            |
| HNF1A                 | -1.937 AI323641, HNF1, HNF1 homeobox A, HNF1-alpha, HNF1-α, HNF1alpha (MODY3), HNF1α (I                  |
| HNF4A                 | -2.850 FLJ39654, FRTS4, hepatic nuclear factor 4, alpha, hepatic nuclear factor 4, α, hepatocyte nu      |
| HOXC4                 | 2.168 cp19, homeo box C4, Hox-3.5, HOX3, HOX3E, Hox3r3, Hs.567289                                        |
| HOXD12                | 1.819 homeo box D12, Hox-4.7, Hox-5.6, HOX4H, RP23-313J15.7                                              |
| HOXD4                 | 1.939 6030436D05RIK, HHO.C13, homeo box D4, Hox-4.2, HOX-5.1, HOX4, HOX4B                                |
| HSD17B14              | -1.658 0610039E24RIK, DHRS10, hydroxysteroid (17-beta) dehydrogenase 14, hydroxysteroid (17-β            |
| Hsd3b4 (includes oth  | -3.729 3 beta Hsd, 3 Beta hydroxysteroid dehydrogenase, 3 beta-hydroxysteroid dehydrogenase typ          |
| I730030J21Rik         | 1.736 RIKEN cDNA I730030J21 gene                                                                         |
| ifitm7                | 1.722 4933438K12Rik, interferon induced transmembrane protein 7, Mil4                                    |
| IGDCC3                | 2.005 2810401C09RIK, AI851425, HsT18880, immunoglobulin superfamily, DCC subclass, member                |
| IGDCC4                | 1.920 9330155G14RIK, DDM36, immunoglobulin superfamily, DCC subclass, member 4, NOPE, W                  |
| IGFBP1                | -2.022 AFBP, BOS 4373, hIGFBP-1, IBP1, IGF-BP25, IGFBPA, IGFBP-RP1, insulin-like growth factor           |
| IL15RA                | 1.676 AA690181, CD215, IL-15 Receptor Alpha, IL-15 Receptor α, IL-15R, IL-15Ralpha, IL15R α, in          |
| IL33                  | 1.893 9230117N10Rik, C9orf26, DVS27, IL1F11, interleukin 33, NF-HEV, NFEHEV, RGD1311155, F               |
| IPO9                  | 1.762 0710008K06Rik, AI845704, C78347, Imp9, importin 9, KIAA1192, mKIAA1192, Ranbp9, RP1                |
| IRX1                  | -2.346 iroquois homeobox 1, Iroquois related homeobox 1 (Drosophila), IRX-5, IRXA1, LOC501463            |
| ITIH5                 | 2.274 4631408O11RIK, 5430408M01Rik, AI317339, E130106B02, FLJ14641, inter-alpha (globulin)               |
| ITPKA                 | 1.928 inositol 1,4,5-trisphosphate 3-kinase A, inositol-trisphosphate 3-kinase A, IP3-3KA, IP3KA, RF     |
| ITSN1                 | 1.714 AA517634, AA545208, AI316805, AI839402, AI848451, Ehsh1, Ese1, INTERSECTIN, Interse                |
| JADE2                 | 1.536 1200017K05RIK, AI480685, jade family PHD finger 2, KIAA0239, mKIAA0239, PHF15, RP23-               |
| KANK2                 | 1.567 AI504612, ANKRD25, BC010245, DKFZp434N161, KN motif and ankyrin repeat domains 2, N                |
| KAZALD1               | -3.362 AI842353, BONO1, FKSG28, FKSG40, IGFBP-rP10, Kazal-type serine peptidase inhibitor do             |
| KCNA4                 | 1.704 HBK4, HK1, HPCN2, HUKII, K+ CHANNEL A, KCHAN, KCNA4L, KCNA8, KV1.4, Kv1.4 α, Kv                    |
| KCNJ2                 | 1.898 AI839615, AW555701, KV4.2, mKIAA1044, MNCb-7013, potassium voltage-gated channel, S                |
| KCNJ1                 | -7.396 Kcnj, KIR1.1, potassium inwardly-rectifying channel, subfamily J, member 1, ROMK, ROMK1,          |
| KCP                   | 1.703 AW060220, CRIM-2, Gm793, KCP-1, kielin/chordin-like protein, NET67, RGD1561119                     |
| KIAA1467              | 1.650 8430419L09Rik, mKIAA1467, RGD1306151, RIKEN cDNA 8430419L09 gene, similar to hypc                  |
| KIF1A                 | 1.705 ATSV, C2orf20, C630002N23Rik, Gm1626, HSN2C, Kin1a, kinesin family member 1A, Kinesi               |
| KIF21B                | 1.729 2610511N21Rik, KIAA0449, kinesin family member 21B, mKIAA0449                                      |
| KIF5C                 | 1.518 CDCBM2, Khc, KIAA0531, Kif5c (predicted), kinesin family member 5C, KINN, NKHC, NKHC               |
| KIFC2                 | 1.755 kinesin family member C2                                                                           |
| KLC2                  | 1.546 8030455F02RIK, AW212649, kinesin light chain 2, Klc2 predicted                                     |
| KRT36                 | -2.646 HA6, hHa6, HRA-1, K36, Ka31, keratin 36, Keratin complex 1, acidic, gene 5, Krt1-22, Krt1-5,      |
| LARGE                 | 1.547 BPFD#36, CTA-282F2.1, ENR, fg, froggy, Gylt1a, like-glycosyltransferase, Mbp-1, MDC1D, M           |
| LDB2                  | 1.686 AI035351, AW146358, CLIM1, CLP-36, LDB1, Ldb3, LIM domain binding 2                                |
| LDLRAD3               | 1.708 6430500P08, AI194318, LOC100909436, low density lipoprotein receptor class A domain con            |
| LHX1                  | -1.676 LIM homeobox 1, LIM homeobox protein 1, LIM-1, RP23-381C21.1                                      |
| LIMK1                 | 1.528 LIM domain kinase 1, LIM-domain containing, protein kinase, LIMK                                   |
| LOC102635467          | 1.548 uncharacterized LOC102635467                                                                       |
| LOC102638978          | 1.684 uncharacterized LOC102638978                                                                       |
| LOC102641046          | 1.596 h-2 class I histocompatibility antigen, D-37 alpha chain-like, h-2 class I histocompatibility anti |
| LOC102641638          | -1.907 high mobility group protein B1-like                                                               |
| LPIN2                 | -1.524 2610511G02Rik, AI481352, AW742896, Lipin 2                                                        |
| LRP11                 | 1.711 1700034J19RIK, 6330533B21, 9830160H19RIK, bA350J20.3, low density lipoprotein recepto              |
| LRP2                  | -1.780 AI315343, AW536255, b2b1625.2Clo, D230004K18Rik, DBS, GP330, HEYMANN NEPHRITI:                    |
| Lrrc31                | 1.579 E230002P03Rik, leucine rich repeat containing 31                                                   |
| LRRC4B                | 1.812 A830007M12, HSM, leucine rich repeat containing 4B, LRIG4, NGL-3                                   |
| LUC7L2                | 1.822 4930471C18Rik, AA522013, AU015269, CGI-59, CGI-74, LOC100504012, LUC7-like 2 (S. ce                |
| Ly6a (includes other: | -2.476 AA682074, AA959465, AI789751, Gr-1, I830127L07Rik, LOC100911104, LOC300024, Ly-6.2                |
| LY86                  | -1.687 dJ80N2.1, lymphocyte antigen 86, MD-1, MMD-1, RP1-80N2.1                                          |
| LZTS1                 | 1.605 F37, FEZ1, leucine zipper, putative tumor suppressor 1, leucine zipper, putative tumour suppr      |
| MADD                  | 1.721 9630059K23Rik, IG20, KIAA0358, MAP-kinase activating death domain, RAB3GEP, RP23-20                |
| MAFB                  | -1.984 b-maf, Basic domain/leucine zipper transcription factor, kr, Kreisler, KRML, Krm1, Maf1, MCT      |
| MALAT1                | 1.596 2210401K01RIK, 9430072K23RIK, AI647968, HCN, LINC00047, mascRNA, metastasis asso                   |
| MARK4                 | 1.518 2410090P21Rik, C79806, LOC686800, MAP/microtubule affinity-regulating kinase 4, MARK4              |
| MB21D1                | 1.749 C6orf150, cGAS, E330016A19RIK, h-cGAS, Mab-21 domain containing 1, RP11-398K22.2                   |
| MBD1                  | 1.650 CXXC3, methyl-CpG binding domain protein 1, PCM1, RFT                                              |
| MCAM                  | 1.634 1-gicerin, AV025631, CD146, CD149, melanoma cell adhesion molecule, MELCAM, MUC18,                 |
| MCTP2                 | 1.804 Gm489, multiple C2 domains, transmembrane 2, RGD1562967, RP11-4F5.2                                |

|                      |               |                                                                                                           |
|----------------------|---------------|-----------------------------------------------------------------------------------------------------------|
| MDF1                 | 1.697         | I-MF, I-mfa, MyoD family inhibitor, RGD1560271, RP4-696P19.1                                              |
| ME3                  | -1.925        | 1700020C08Rik, B230207H15RIK, malic enzyme 3, NADP(+)-dependent, mitochondrial, NAI                       |
| MEDAG                | 1.574         | 633040615Rik, AWMS3, C13orf33, hAWMS3, mAWMS3, MEDA-4, mesenteric estrogen-dep                            |
| MEF2A                | 1.675         | A430079H05Rik, ADCAD1, M-S EF2A, mef2, myocyte enhancer factor 2A, RSRFC4, RSRFC                          |
| Meg3                 | 1.643         | 2900016C05Rik, 3110050O07Rik, 6330408G06Rik, AI425946, AW108224, D12Bwg1266e, G                           |
| <b>MEOX2</b>         | <b>-3.693</b> | <b>AI528662, GAX, mesenchyme homeobox 2, MOX2, Mox2a</b>                                                  |
| MEP1A                | -4.657        | AI098089, AW107200, LOC688307, Mep-1, meprin 1 alpha, meprin 1 $\alpha$ , Meprin a subunit alpi           |
| MEP1B                | -8.161        | Endopeptidase-2, meprin 1 beta, meprin 1 $\beta$ , Meprin a subunit beta, Meprin a subunit $\beta$ , mep  |
| MGEA5                | 1.604         | 2810009A20Rik, 4833427O07Rik, 5830447M11Rik, AA408215, Hy5, MEA5, meningioma exp                          |
| MIB2                 | 1.550         | 2210008111Rik, FLJ20648, LOC100128968, mindbomb E3 ubiquitin protein ligase 2, mindbor                    |
| Milr1                | 1.551         | Allergin-1, Gm885, mast cell immunoglobulin-like receptor 1, Mca32                                        |
| MLF1                 | 1.673         | HLS7, myeloid leukaemia factor 1, myeloid leukemia factor 1                                               |
| MLXPL                | 1.744         | bHLHd14, CHREBP, MIO, MLX interacting protein-like, MONDOB, WBSCR14, WS-bHLH                              |
| MMS22L               | 1.674         | C6orf167, dJ39B17.2, F730047E07Rik, Gm134, MMS22-like, DNA repair protein, RGD13046                       |
| NN1                  | 1.575         | AA003644, AA009236, CTA-437G10 B.1, dJ353E16.2, meningioma (disrupted in balanced tr                      |
| Ms4a4b (includes otl | 1.713         | 2210417J23Rik, 5830413L19Rik, AI449185, AI463180, Chandra, Ly116, membrane-spanning                       |
| MTRFR2               | 1.715         | 2610016C23Rik, 4933412C16Rik, DUF1, FAM54A, LOC100911069, mitochondrial fission re                        |
| <b>MYC</b>           | <b>-1.593</b> | <b>AU016757, bHLHe39, BOS 13758, C-MYC-P64, CMYC, mMyc, MRTL, Myc2, MYCC, myeloc</b>                      |
| MYH7                 | 1.854         | B-MHC, beta cardiac myosin heavy chain, beta MYHC, beta myosin, Beta Myosin Heavy Cha                     |
| NAV1                 | 1.556         | 95300089B19, 9930003A20Rik, BC028801, C230080M11Rik, LOC685707, mKIAA1151, neurc                          |
| NCL                  | -1.545        | B530004O11Rik, C23, DONds28, D1Nds28, LOC100289394, NUCL, nucleolin                                       |
| NDOR1                | 1.546         | 4930447P04Rik, bA350O14.9, LOC648245, NADPH dependent diflavin oxidoreductase 1, Nc                       |
| NDRG4                | 1.556         | AF045564, BDM1, D8Bwg1337e, N-myc downstream regulated gene 4, Ndr1-rs, NDR4, NDR                         |
| NELFCD               | 1.560         | 2410003I03Rik, C77797, HSPC130, negative elongation factor complex member C/D, negati                     |
| NELL1                | 1.566         | B230343H07RIK, IDH3GL, I7R6, NEL-like 1, NEL-like 1 (chicken), NRP1                                       |
| NEURL1B              | 1.719         | C230078M08Rik, DKFZp761M1511, EG240055, hNeur2, neur2, neuralized E3 ubiquitin prote                      |
| NFIB                 | 1.562         | 6720429L07Rik, CTF, E030026I10RIK, NF- $\kappa$ B, NF1-B, NF1-b1, NFI-RED, NFIB2, NFIB3, Nuc              |
| NME5                 | 1.577         | 1700019D05Rik, NM23-H5, Nm23-M5, NME/NM23 family member 5, RSPH23                                         |
| NPB                  | -1.696        | LOC653419, neuropeptide B, PPL7, PPNPB, RP23-84C12.7                                                      |
| Npcd                 | 1.668         | Cbx6-Nptxr, neuronal pentraxin chromo domain                                                              |
| <b>NPHS2</b>         | <b>-5.836</b> | <b>AI790225, nephrosis 2, idiopathic, steroid-resistant, nephrosis 2, idiopathic, steroid-resistant (</b> |
| NRSN1                | 3.977         | Neurensin-1, Neuro-p24, p24, RP11-176J5.1, RP23-19G4.1, VMP                                               |
| NT5DC3               | 1.564         | 5'-nucleotidase domain containing 3, AU040402, AW540062, C630002B14Rik, LOC687698, N                      |
| NTSR1                | 1.735         | Neurotensin Receptor, neurotensin receptor 1, neurotensin receptor 1 (high affinity), NT-1R, N            |
| NXP3                 | 1.566         | neurexophilin 3, NPH3, RP23-67E18.5, UNQ687/PRO1327                                                       |
| OCM                  | 1.650         | hCG 18255, LOC730297, OCM1, Ocm2, OM, ONCM, oncomodulin, Oncomodulin, oncomoduli                          |
| OGFOD1               | 1.698         | 2-oxoglutarate and iron-dependent oxygenase domain containing 1, 4930415J21Rik, AA3871                    |
| <b>OSR2</b>          | <b>-1.704</b> | <b>5430409I15RIK, odd-skipped related 2, odd-skipped related transcription factor 2, Osr2A, Osr2</b>      |
| PAK4                 | 1.678         | 5730488L07Rik, AW555722, mKIAA1142, p21 protein (Cdc42/Rac)-activated kinase 4                            |
| PAPD5                | 1.543         | 5730445M16Rik, 5830428A09, PAP associated domain containing 5, TRF4-2                                     |
| PAQR5                | -1.778        | 0610010I15RIK, AV002411, BB115488, MPRG, Pmrgamma, progesterin and adipoQ receptor fa                     |
| PAQR6                | 1.507         | 1500001B10RIK, LOC686392, progesterin and adipoQ receptor family member VI, RP11-54H11                    |
| PARD3                | -2.410        | AA960621, AI256638, ASIP, atypical pkc-specific binding, Baz, D8ErtD580e, MPAR3, PAR-3,                   |
| PARK2                | 1.511         | AR-JP, KB-152G3.1, LPRS2, Park, Parkin, parkin RBR E3 ubiquitin protein ligase, Parkinson                 |
| PBLD                 | 1.613         | 0610038K03Rik, MAWBP, MAWDBP, Pbl1, Pbl2, phenazine biosynthesis-like protein doma                        |
| <b>PBX1</b>          | <b>1.544</b>  | <b>2310056B04RIK, D230003C07RIK, PBX, pre-B-cell leukaemia homeobox 1, pre-B-cell leuken</b>              |
| PCDH17               | 1.549         | C030033F14RIK, Gm78, LOC144997, PCDH68, PCH68, protocadherin 17                                           |
| PCDH19               | 1.565         | B530002L05Rik, EFMR, EIEE9, Gm717, LOC279653, mKIAA1313, protocadherin 19, RGD11                          |
| PCDH8                | 2.496         | 1700080P15Rik, ARCADLIN, PAPC, protocadherin 8                                                            |
| PCLO                 | 1.788         | ACZ, aczonin, KIAA0559, Piccolo, piccolo (presynaptic cytomatrix protein), piccolo presynapti             |
| PCP4                 | -2.400        | P16Rimb19, PEP-19, PEPZ19, Purkinje cell protein 4                                                        |
| PCSK2                | -2.336        | 6330411F23Rik, AI839700, NEC-2, PC2, Phpp-2, proprotein convertase subtilisin/kexin type 2                |
| PCSK9                | -1.810        | AI415265, AI747682, FH3, HCHOLA3, LDLQC1, NARC-1, PC9, proprotein convertase subtili                      |
| PDHB                 | 1.914         | 2610103L06Rik, AL024199, C81408, Odbp, PDHBD, PDHE1-B, PHE1B, Pyruvate dehydroge                          |
| PDP1                 | 1.634         | Gm1024, PDH, PDP, Pdp1c, PDPC, PPM2C, PYRUVATE DEHYDROGENASE, Pyruvate Del                                |
| PDZK1                | -3.366        | 1700023D20Rik, 2610507N21Rik, 4921513F16Rik, AI267131, AI314638, AL022680, CAP70,                         |
| PEAK1                | 1.618         | 1110049L02Rik, 9530046P14, AA690169, BE132841, C230081A13Rik, KIAA2002, mKIAA20                           |
| PERP                 | -1.597        | 1110017A08Rik, dJ496H19.1, ineligibleperp, KCP1, KRTCAP1, p53 apoptosis-associated tar                    |
| PGM2L1               | 2.022         | 4931406N15RIK, AI553438, BM32A, FLJ32029, LOC683619, phosphoglucomutase 2-like 1                          |
| PIGT                 | 1.540         | 2510012P17RIK, 4930534E15RIK, CGI-06, GPI AMIDASE, MCAHS3, NDAP, Ndap7, phosph                            |
| PIPOX                | -2.896        | LPIPOX, Peroxisomal sarcosine oxidase, pipecolic acid oxidase, Pso, SOX                                   |
| PLEKHG3              | 1.576         | ARHGEF43, BC030417, KIAA0599, pleckstrin homology domain containing, family G (with RI                    |
| PNMA2                | 3.747         | A830049P17RIK, MA2, mKIAA0883, MM2, paraneoplastic antigen MA2, paraneoplastic Ma ar                      |
| POT1                 | 1.615         | 1500031H18Rik, AI851169, CMM10, HPOT1, Pot1a, protection of telomeres 1, protection of t                  |
| Pou3f1               | 1.635         | Oct-6, Otf-6, POU domain, class 3, transcription factor 1, RP23-230F2.2, Scip, Test1, Tst-1               |
| Ppfi4                | 1.563         | 1110008G13RIK, AI448359, AI852265, C81506, protein tyrosine phosphatase, receptor type, f                 |
| PPM1K                | 1.568         | 2900063A19RIK, A930026L03RIK, BDP, MSUDMV, PP2Ckappa, PP2Cm, protein phosphatase                          |
| PPP1R13B             | 1.505         | AI449786, ASPP1, AW545810, p53BP2-like, p85, protein phosphatase 1, regulatory (inhibitor                 |
| PPP1R3B              | 1.764         | 6430576E21, AW821953, GL, LOC192280, LOC286044, PPP1R4, protein phosphatase 1, re                         |
| PRKCA                | 1.517         | AAG6, AI875142, BOS 19579, LOC146784, PKC-alpha, PKC- $\alpha$ , PKCA, PKRCA, PRKACA, pr                  |
| PRKCB                | 1.696         | A130082F03RIK, BOS 22739, PKC Type II, PKC Type III, PKC $\beta$ 1, PKC-Beta, PKC- $\beta$ , PKCB,        |
| Psg18 (includes oth  | -1.599        | 1600019C01RIK, 1600025N01RIK, 1600026N13RIK, 1620401C02RIK, AA408604, Cea-2, Cea                          |



|               |                                                                                                        |
|---------------|--------------------------------------------------------------------------------------------------------|
| PSME3         | 1.724 AA410043, Ab2-371, AU020960, HEL-S-283, Ki, Ki Nuclear Autoantigen, PA28-gamma, PA28             |
| PTPN5         | 4.853 FLJ1442, protein tyrosine phosphatase, non-receptor type 5, protein tyrosine phosphatase, n      |
| PTPRO         | -3.608 D28, GLEPP, GLEPP1, NPHS6, protein tyrosine phosphatase, receptor type, O, PTP PHI, PT          |
| PTPRS         | 1.571 AC073761.1, AL022616, Lar-ptp2, protein tyrosine phosphatase, receptor type, S, PTP, PTP-I       |
| QPR7          | -1.812 2410027J01RIK, AI647766, HEL-S-90n, LOC100912382, Qaprt, QPRTase, QUINOLINATE P                 |
| R3HDML        | -12.051 dJ881L22.3, LOC100046603, OTTMUSG0000001070, R3H domain containing-like, RP23-3                |
| RAB3B         | 1.605 2610528C18Rik, RAB3B, member RAS oncogene family, RP23-31C9.4                                    |
| RAB43         | 1.577 1810048P08Rik, 2500004H21Rik, AW490415, RAB11B, RAB41, RAB43, member RAS onco                    |
| RAD51C        | 1.597 BROVCA3, FANCO, R51H3, RAD51 homolog C, RAD51 paralog C, RAD51L2, RGD1563765                     |
| RALGSP1       | 1.588 5830418G11Rik, AI853783, AI854138, mKIAA0351, Ral GEF with PH domain and SH3 bindir              |
| RBFOX1        | 1.550 2BP1, A2bp, A2BP1, FOX-1, HRNBP1, LOC100287538, MNCb-3035, RNA binding protein, fc               |
| RBM47         | -1.505 9530077J19Rik, FLJ20273, NET18, RGD1359713, RNA binding motif protein 47                        |
| RET           | 1.722 C-RET, CDHF12, CDHR16, HSCR1, MEN2A, MEN2B, MTC1, PTC, RET PROTO-ONCOGEN                         |
| RGS10         | 1.691 2310010N19Rik, regulator of G-protein signaling 10, Regulator of G-protein signalling 10         |
| RIMKLA        | -1.652 AK047164, B93003J024, FAM80A, NAAGS, NAAGS-II, ribosomal modification protein rimK-III          |
| RIMS3         | 1.874 A730060M23Rik, KIAA0237, mKIAA0237, Nim2, NIM3, regulating synaptic membrane exocyt              |
| RIN2          | 1.517 2010003K16Rik, 4632403N06Rik, AW821980, MACS, RAB5 interacting protein 2, Ras and R              |
| RIPK3         | 1.560 2610528K09Rik, AW107945, HCPY2, receptor-interacting serine-threonine kinase 3, RIP3             |
| RIPPLY2       | -5.658 C030002E08Rik, C6orf159, dJ237115.1, Gm1122, RGD1308746, ripply transcriptional repres          |
| RNASE4        | 1.752 C730049F20RIK, RAB1, RIBONUCLEASE 4, ribonuclease, RNase A family 4, ribonuclease, I             |
| RNF213        | 1.636 6030403J01, ALO17, C17ORF27, D11Erd759e, FRAG-6, hCG 1812857, KIAA1554, KIAA16                   |
| ROBO2         | -1.657 2600013A04Rik, 9430089E08Rik, BB097918, D230004I22Rik, mKIAA1568, roundabout hom                |
| ROR2          | 1.603 BDB, BDB1, mRor2, NTRKR2, receptor tyrosine kinase-like orphan receptor 2, RP11-818.2            |
| RPH3AL        | -1.538 6530413F01RIK, AI551877, Gm1753, NOC2, rabphilin 3A-like (without C2 domains), RP23-7           |
| RSPH1         | 1.703 CT79, MCA, radial spoke head 1 homolog (Chlamydomonas), RSP44, RSPH10A, TSA2, TSC                |
| RTP4          | 1.594 5830458K16Rik, IFRG28, receptor (chemosensory) transporter protein 4, receptor transporte        |
| RUNX1T1       | 1.608 AML1T1, CBFA2T1, Cbfa2t1h, CDR, ETO, MTG8, RP23-134H12.1, Run1t1, runt-related trans             |
| S100G         | -2.846 AU042539, CABP, CaBP-D9K, CABP1, CABP9K, Cad9k, CALB3, Calbindin D-9K, Cbpi, Rnc                |
| SAP25         | 1.513 LOC100289367, RGD1562406, sin3 associated polypeptide, Sin3A-associated protein 25, Sii          |
| SCN8A         | 1.674 AI853486, C630029C19Rik, CERIII, CIAT, dmu, EIEE13, FLJ33996, MED, mnd-2, NaCh6, Ne              |
| Sct           | 1.524 Secr, Secretin                                                                                   |
| SCUBE1        | 1.791 7330410C13Rik, A630023E24Rik, AL583887.1, signal peptide, CUB domain, EGF-like 1                 |
| SCX           | -1.765 BB114693, bHLHa41, bHLHa48, LOC684826, Scl, scleraxis, scleraxis basic helix-loop-helix tr      |
| SEMA4C        | 1.639 AI426163, M-SEMA-F, mKIAA1739, RGD1562837, sema domain, immunoglobulin domain (Ig                |
| SEMA4G        | 1.506 AI507908, AW554132, RP11-108L7.1, sema domain, immunoglobulin domain (Ig), transmem              |
| SEMA6C        | 1.597 m-SemaY, m-SemaY2, mKIAA1869, RP11-68L18.3, sema domain, transmembrane domain (T                 |
| SEMA6D        | 1.669 1110067B02Rik, AA409156, D330011G23, mKIAA1479, RP23-455E2.1, sema domain, trans                 |
| SEPT3         | 1.730 3110018K01RIK, AV154067, B530002E20Rik, bK250D10.3, CTA-250D10.3, SEP3, septin 3                 |
| SERPINA1      | -2.476 A1-PI, A1A, A1AT, AAT, AAT2, AI118301, alpha 1 antiprotease, Alpha 1 Protease Inhibitor, alpi   |
| SERPINB8      | 1.717 CAP-2, NK10, ovalbumin, P18, PROTEINASE INHIBITOR 8, serine (or cysteine) peptidase inl          |
| SERPINF2      | -2.879 A2AP, AAP, AI747498, alpha 2 PLASMIN INHIBITOR, ALPHA2-P1, alpha2 ANTIPLASMIN, AI               |
| SGK2          | -2.496 AI098171, AW146006, dJ138B7.2, H-SGK2, RP1-138B7.2, RP23-335N12.5, Serum/glucocon               |
| SGSH          | 1.714 4632406A19Rik, HSS, MPS3A, N-sulfoglucosamine sulfohydrolase, N-sulfoglucosamine sulf            |
| SHISA2        | -1.908 9430059P22Rik, bA398O19.2, C13orf13, hShisa, LOC387914, MAd2, Mem46, mShisa, PRO                |
| SKAP1         | 2.127 1700091G21Rik, HEL-S-81p, RP23-196B19.1, SCAP1, SKAP55, src family associated phosph             |
| Skint7/Skint8 | 1.717 C130057D23Rik, LOC684023, OTTMUSG00000009475, RP23-269E13.1, selection and upk                   |
| SLC14A2       | 1.584 hUT-A6, HUT2, Rut, Slc14a2 v4, Slc14a2T, solute carrier family 14 (urea transporter), membe      |
| SLC14A4       | 1.741 ASCT-1, AW045657, Neutral amino acid transporter, Neutral amino acid transporter a, RP23-        |
| SLC22A6       | -2.819 HOAT1, mOat1, NKT, OAT1, Orct11, PAHT, ROAT1, solute carrier family 22 (organic anion tra       |
| SLC23A3       | -3.201 E2BP3, hCG 1811885, solute carrier family 23 (nucleobase transporters), member 3, solute c      |
| SLC26A11      | 1.549 F630021I08RIK, LOC688294, MGC46523, RP23-25M3.3, solute carrier family 26 (anion exc             |
| SLC29A4       | 2.504 ENT4, mPMAT, PMAT, PSEC0113, solute carrier family 29 (equilibrative nucleoside transport        |
| Slc2a4rg-ps   | 1.552 C430010C01, Gm14462, OTTMUSG00000016710, Slc2a4 regulator, pseudogene                            |
| SLC32A1       | 2.326 hVIAAT, LOC100364703, R75019, RP23-392P11.5, solute carrier family 32 (GABA vesicular t          |
| SLC34A1       | -5.286 FRTS2, Na/Pi Cotransporter Type 2a, Napi iia, NaPi-2, NAPI-3, NaPi2A, NPHLOP1, NPT2, N          |
| SLC35G1       | 1.616 AA590464, C10orf60, D330039I19Rik, solute carrier family 35, member G1, TMEM20                   |
| SLC37A4       | -1.592 G6PT, G6PT1, G6PT2, G6PT3, Glycogen Storage Disease Type Ib, GSD-1b, GSD1c, GSD1c               |
| SLC38A5       | 2.078 AF276870, C81234, E330031E14, JM24, PP7194, RP23-224M4.2, SN2, SNAT5, solute carri               |
| SLC4A11       | 2.255 AI503023, BTR1, CDPD1, CHED2, dJ79416.2, NABC1, RP4-79416.3, Slc4a11 predicted, solu             |
| SLC6A13       | -1.552 Gabt3, GAT-2, GAT3, solute carrier family 6 (neurotransmitter transporter), member 13, solute   |
| SLC8A2        | 1.504 NCX2, SLC8A, solute carrier family 8 (sodium/calcium exchanger), member 2                        |
| SLIT1         | 1.544 MEGF4, mKIAA0813, RP11-175O19.2, SLIL1, slit homolog 1 (Drosophila), SLIT3                       |
| SLN           | 8.563 2310045A07Rik, sarcolipin                                                                        |
| SMARCA2       | 1.594 2610209L14RIK, BAF190, brahma, BRM, BRM1, hBRM, hSNF2a, NCBRS, SNF2, SNF2alph                    |
| SMIM24        | -1.566 2210404O07Rik, C19orf77, HSPC323, small integral membrane protein 24                            |
| SNED1         | 1.633 6720455I24Rik, AI197264, AI642697, D430044C15RIK, DKFZp586B2420, FLJ00133, IRE-BF                |
| SOD3          | -1.747 AI314465, EC-SOD, ECSODPT, superoxide dismutase 3, extracellular                                |
| SOSTDC1       | -2.426 0610006G05Rik, CDA019, ECTODIN, sclerostin domain containing 1, Sostl, USAG-1, Wise             |
| SP110         | 1.732 5031415C07RIK, 5830484A20RIK, ENSMUSG00000075603, Gm15753, IFI41, IFI75, IPR1, I                 |
| SP5           | 2.185 Sp5 transcription factor, trans-acting transcription factor 5                                    |
| SPAG7         | 1.762 5730443G10, ACRP, DN-183N8.18-002, FSA-1, Fsa1l, sperm associated antigen 7                      |
| SPINK1        | -4.790 LOC266602, p12, PCTT, PSTI, Psti-i, Psti-ii, serine peptidase inhibitor, Kazal type 1, serine p |



|                    |                                                                                                     |
|--------------------|-----------------------------------------------------------------------------------------------------|
| SPOCK2             | -1.776 AA407235, GCAP26, KIAA0275, mKIAA0275, sparc/osteonectin, cwcv and kazal-like domain         |
| SPP2               | -7.346 0610038004RIK, LOC94168, pp-24, secreted phosphoprotein 2, secreted phosphoprotein 2,        |
| SREK1              | 1.648 8430401B01, AI450757, AI462342, SFRS12, splicing regulatory glutamine/lysine-rich protein     |
| ST3GAL6            | -1.780 1700023B24RIK, AI930218, alpha-2,3-sialyltransferase VI, AW552396, RP24-293N14.3, Sialy      |
| STAB2              | 1.786 FEEL-2, FELE-2, FELL, FELL2, FEX2, HARE, MFEEL-2, STABILIN-2                                  |
| STEAP1             | -1.742 2410007B19RIK, PRSS24, six transmembrane epithelial antigen of the prostate 1, STEAP, tce    |
| STEAP2             | -1.672 4921538B17RIK, AI930049, AW045895, ENSMUSG00000073232, IPCA-1, PCANAP1, PUMI                 |
| STIM1              | 1.703 D11S4896E, GOK, IMD10, SIM, STRMK, stromal interaction molecule 1, TAM, TAM1                  |
| STMN2              | 2.199 AI159727, SCG10, SCGN10, stathmin 2, stathmin-like 2, Stmb2                                   |
| STXPB1             | 1.516 AI317162, AI326233, ANC18HA, MMS10-G, Ms10g, Munc-18a, MUNC18-1, NSEC1, NSEC1                 |
| Sult1d1            | -7.906 5033411P13RIK, AI987815, Amine n-sulfotransferase, ST1D1, sulfotransferase family 1D, me     |
| SUV39H2            | 1.600 4930507K23RIK, AA536750, D030054H19RIK, D2Erd544e, KMT1B, RP11-2K17.2, RP23-16                |
| SVOP1              | -1.573 9430071P14RIK, RGD1566053, similar to RIKEN cDNA 9430071P14 gene, SV2 related prote          |
| SYNJ1              | 1.760 A930006D20RIK, AA675315, INPP5G, mKIAA0910, PARK20, synaptotaxin 1                            |
| SYNP2L             | 1.643 1110054M18RIK, Chap, FLJ12921, RGD1565434, synaptopodin 2-like                                |
| TBX3               | 1.547 D5Erd189e, LOC100047200, T-box 3, TBX3-ISO, UMS, XHL                                          |
| TCEAL5             | 1.507 6430401A05RIK, LLOXNC01-177E8.1, LOC678833, RP23-132M9.2, transcription elongation f          |
| TCF24              | 3.384 bHLHa25, ENSMUSG00000073738, Gm10567, Gm2330, LOC100045893, transcription factc               |
| TCP11L2            | 1.701 E430026E19RIK, RGD1307494, t-complex 11 (mouse) like 2, t-complex 11, testis-specific-like    |
| TENM4              | 1.612 Doc4, ELM2, I(7)-3Rn, I7Rn3, mKIAA1302, ODZ4, R75022, Ten-4, teneurin transmembrane p         |
| TFEB               | 1.726 ALPHATFEB, BHLHE35, RP4-696P19.3, TCFEB, transcription factor EB                              |
| TGM5               | 1.534 2310007C07RIK, LOC688031, LOC691932, RP23-263D22.4, similar to transglutaminase 7, T          |
| THNSL2             | -1.565 BC051244, FLJ10916, RGD1309144, threonine synthase-like 2 (bacterial), threonine synthas     |
| THY1               | 1.528 CD7, CD90, LOC94105, T25, Thy-1 cell surface antigen, Thy1.1, Thymus cell antigen 1, thet     |
| TIAM2              | 1.626 3000002F19RIK, LOC100362710, mKIAA2016, RP3-414L4.2, STEF, T-cell lymphoma invasiv            |
| TINAG              | -2.733 AI452335, RP11-12414.1, tubulointerstitial nephritis antigen                                 |
| TMEM174            | -2.675 0610009B10RIK, AA986094, transmembrane protein 174                                           |
| TMEM213            | -1.977 D630002J15RIK, LOC684143, transmembrane protein 213                                          |
| TMEM239            | 1.689 4933425O20RIK, LOC100048703, LOC100291033, LOC100291571, RP23-29K12.6, transme                |
| TMEM25             | -1.833 0610039J01RIK, AI429491, LOC683488, transmembrane protein 25, UNQ2531/PRO6030                |
| Tmem254a (includes | 1.580 0610008K04RIK, 0610010A22RIK, AA960404, D14Erd449e, ENSMUSG00000021867, ENSM                  |
| TMEM27             | -2.423 0610008J07RIK, collectrin, NX-17, RP23-59N7.2, transmembrane protein 27, UNQ679/PRO1         |
| TMEM59L            | 1.560 5330410G16RIK, BSMAP, C19orf4, RGD1305557, transmembrane protein 59-like                      |
| TMEM8B             | 1.583 4930500O05RIK, C9orf127, NAG-5, NGX6, RGD1310012, RP11-112J3.10, RP23-191F22.12-              |
| TMPRSS3            | 1.742 DFNB10, DFNB8, ECHOS1, TADG12, transmembrane protease, serine 3, UNQ323/PRO382                |
| TNFRSF10A          | 1.589 APO2, CD261, Death receptor 4, DR, DR4, DR5, KILLER, Ly98, MK, Tnfrsf10b, TR1, TRAIL r        |
| TNFRSF9            | 1.663 4-1BB, A930040I11RIK, AA408498, AI325004, CD137, CDw137, ILA, Ly63, RP23-272N19.6,            |
| TNN1               | -1.662 2700018B22RIK, AI472285, Slow tni, SSTNI, TNN1, Troponin I slow, troponin I type 1 (skeletal |
| TPBG               | 2.099 5T4, 5T4AG, AW495680, M6P1, trophoblast glycoprotein, WAIF1                                   |
| TRAF1              | -3.625 4732496E14RIK, EBI6, ineligibleraf1, MGC:10353, RP23-9N11.6, TNF receptor-associated fe      |
| TRH                | -4.460 Pro-TRH, THR, thyrotropin-releasing hormone, TRF, TRH01                                      |
| TRIB3              | 1.744 C20orf97, HTRB-3, Ifld2, LOC246273, NIPK, RP23-396N8.1, RP5-1103G7.7, SINK, SKIP3, T          |
| TRIM25             | 1.688 AA960166, AL022677, EFP, estrogen-responsive finger, RNF147, RP23-176J13.7, TRIM25 a          |
| TSPAN17            | 1.738 2210021G21RIK, AI047581, FBX23, FBXO23, GHB-R, MGC14859, tetraspanin 17, TM4SF11              |
| TTYH2              | 1.573 1110001A03RIK, C17orf29, LOC100505117, RGD1562969, RP23-273C14.1, tweety family m             |
| TUBB2B             | 1.612 2410129E14RIK, bA506K6.1, Beta-tubulin T beta15, Beta1 Tubulin, brdp, MGC8685, PMGYS          |
| TWIST2             | 1.503 bHLHa39, Dermo1, FFDD3, SETLSS, twist basic helix-loop-helix transcription factor 2, twist    |
| UBE2I              | 1.674 5830467E05RIK, C358B7.1, F830028O17RIK, LA16c-358B7.1, P18, SUMO E2, UBC9, UbcE               |
| UBTF               | 1.705 A930005G04RIK, LOC679205, NOR-90, RP23-461C4.7, TCFUBF, UBF, UBF1, upstream bin               |
| UGT1A6             | -1.775 A9', GNT1, HLUGP, HLUGP1, UDP glucuronosyltransferase 1, UDP glucuronosyltransferase         |
| UGT2B10            | -2.445 AI788959, UDP glucuronosyltransferase 2 family, polypeptide B10, UDP glucuronosyltransfer-   |
| UGT2B28            | -5.634 0610033E06RIK, 9430041C03RIK, AA986709, AI118071, Androsterone UDP-glucuronosyltran          |
| UNCX               | -1.701 Chx4, LOC100510018, PHD1, tcag7.1272, UNC homeobox, UNCX4.1                                  |
| UNG                | 1.722 DGU, HIGM4, HIGM5, UDG, UNG1, UNG15, UNG2, Uracil hydrolase, uracil-DNA glycosylase           |
| USP51              | 1.837 AV136873, RGD1562211, RP23-415B4.1, ubiquitin specific peptidase 51, ubiquitin specific pr    |
| VAT1L              | -1.586 9430073I07, AI427515, KIAA1576, mKIAA1576, vesicle amine transport 1-like, vesicle amine     |
| VEGFC              | 1.600 AW228853, Flt4 ligand, Flt4-L, LMPH1D, vascular endothelial growth factor C, VRP              |
| VIL1               | -3.708 D2S1471, VIL, Villin, villin 1                                                               |
| WDFY1              | 1.653 1700013B03RIK, 1700120F24RIK, FENS-1, Jr1, mKIAA1435, SR1, WD repeat and FYVE don             |
| WDFY4              | 1.666 C10orf64, Gm18810, hCG 1745555, RGD1564142, WD repeat and FYVE domain containing              |
| WDR89              | 1.646 2600001A11RIK, C14orf150, MSTP050, RGD1307393, WD repeat domain 89                            |
| WSCD2              | 2.008 4933413A10, 4933413A10RIK, C530024P05RIK, Gm450, WSC domain containing 2, Wscd2-1             |
| XPNPEP2            | -2.162 9030008G12RIK, AEACEI, APP2, mAmP, mAPP, Membrane-bound aminopeptidase p, Memb               |
| YBX2               | 1.657 CONTRIN, CSDA3, DBPC, MSY2, RGD1305068, Y box binding protein 2, Y box protein 2              |
| ZCCHC9             | 1.701 1810019C21RIK, PPP1R41, zinc finger, CCHC domain containing 9                                 |
| Zfp133-ps          | 1.679 OTTMUSG00000003825, Zfp133, zinc finger protein 133, pseudogene                               |
| Zfp941             | 1.640 zinc finger protein 941                                                                       |
| ZFFM1              | 1.703 FOG, FOG1, LOC100365064, ZC2HC11A, zinc finger protein, FOG family member 1, zinc fin         |
| ZFFM2              | 1.536 B330005D23RIK, DIH3, FOG-2, hFOG-2, ZC2HC11B, zinc finger protein, FOG family membe           |
| ZMAT4              | 2.200 9630048M01RIK, LOC684906, MATRIN-4, zinc finger, matrin-type 4                                |
| ZNF512B            | 1.513 GM632, RP23-138J20.2, Urk11, Zfp512b, zinc finger protein 512B                                |
| ZNF536             | 1.513 9630010P11RIK, KIAA0390, mKIAA0390, RGD1563363, Zfp536, zinc finger protein 536               |

ZNF703  
ZSWIM8

1.687 1110032O19RIK, AI430822, AL022941, Csmn1, End2, FLJ14299, LOC684528, ZEPP01, Zfp  
1.506 2310021P13Rik, 4832404P21Rik, KIAA0913, LOC196752, mKIAA0913, RGD1309414, zinc f

| Entrez Gene Name                                                         | Agilent              | Location               | Family                     | Drugs                |
|--------------------------------------------------------------------------|----------------------|------------------------|----------------------------|----------------------|
| family with sequence similarity 177, member A                            | A_55_P2114269        | Other                  | other                      |                      |
| RIKEN cDNA 1700110I01 gene                                               | A_55_P2067463        | Other                  | other                      |                      |
| RIKEN cDNA 2310002F09 gene                                               | A_55_P2292737        | Other                  | other                      |                      |
| RIKEN cDNA 2310015B20 gene                                               | A_51_P199352         | Other                  | other                      |                      |
| uncharacterized protein 3830612M24                                       | A_55_P2345853        | Other                  | other                      |                      |
| RIKEN cDNA 4732423E21 gene                                               | A_55_P2210213        | Other                  | other                      |                      |
| RIKEN cDNA 4930412O13 gene                                               | A_55_P2064776        | Other                  | other                      |                      |
| RIKEN cDNA 4932431P20 gene                                               | A_55_P1976682        | Other                  | other                      |                      |
| RIKEN cDNA 4933427D06 gene                                               | A_55_P2038484        | Other                  | other                      |                      |
| RIKEN cDNA 6720422M22 gene                                               | A_55_P2244677        | Other                  | other                      |                      |
| RIKEN cDNA 8030425K09 gene                                               | A_55_P2258216        | Other                  | other                      |                      |
| RIKEN cDNA 9030419F21 gene                                               | A_55_P2279035        | Other                  | other                      |                      |
| lymphocyte antigen 6 complex pseudogene                                  | A_66_P122086         | Other                  | other                      |                      |
| RIKEN cDNA 9130020K20 gene                                               | A_55_P2402134        | Other                  | other                      |                      |
| RIKEN cDNA 9530083O12 gene                                               | A_55_P2209308        | Other                  | other                      |                      |
| RIKEN cDNA 9630010G10 gene                                               | A_55_P2296118        | Other                  | other                      |                      |
| RIKEN cDNA A230065H16 gene                                               | A_55_P2076916        | Other                  | other                      |                      |
| RIKEN cDNA A530006G24 gene                                               | A_55_P2131820        | Other                  | other                      |                      |
| acyl-CoA thioesterase 11                                                 | A_55_P2096043        | Cytoplasm              | enzyme                     |                      |
| acyl-CoA oxidase 3, pristanoyl                                           | A_55_P1971579        | Cytoplasm              | enzyme                     |                      |
| <b>acyl-CoA synthetase medium-chain family member 2A</b>                 | <b>A_55_P2325038</b> | <b>Cytoplasm</b>       | <b>enzyme</b>              |                      |
| acyl-CoA synthetase short-chain family member 2                          | A_55_P1988789        | Cytoplasm              | enzyme                     |                      |
| ADAM metallopeptidase with thrombospondin type 1 motif, 17               | A_55_P2038422        | Extracellular Space    | other                      |                      |
| ADAM metallopeptidase with thrombospondin type 1 motif, 7                | A_55_P1961451        | Extracellular Space    | peptidase                  |                      |
| alpha-fetoprotein                                                        | A_51_P510891         | Extracellular Space    | transporter                |                      |
| <b>aldo-keto reductase family 1, member C3</b>                           | <b>A_55_P2163098</b> | <b>Cytoplasm</b>       | <b>enzyme</b>              |                      |
| aldehyde dehydrogenase 1 family, member A2                               | A_52_P58145          | Cytoplasm              | enzyme                     |                      |
| aldehyde dehydrogenase 1 family, member A3                               | A_52_P87843          | Cytoplasm              | enzyme                     |                      |
| <b>aldolase B, fructose-bisphosphate</b>                                 | <b>A_51_P337269</b>  | <b>Cytoplasm</b>       | <b>enzyme</b>              |                      |
| amion associated transmembrane protein                                   | A_51_P343350         | Plasma Membrane        | other                      |                      |
| ANKH inorganic pyrophosphate transport regulator                         | A_51_P155152         | Plasma Membrane        | transporter                |                      |
| <b>annexin A13</b>                                                       | <b>A_52_P662711</b>  | <b>Plasma Membrane</b> | <b>other</b>               |                      |
| amyloid beta (A4) precursor-like protein 1                               | A_55_P1991605        | Extracellular Space    | other                      |                      |
| Rho GTPase activating protein 26                                         | A_55_P2080562        | Cytoplasm              | other                      |                      |
| Rho guanine nucleotide exchange factor (GEF) 15                          | A_55_P2035087        | Cytoplasm              | other                      |                      |
| ADP-ribosylation factor-like 6 interacting protein 6                     | A_55_P2042993        | Other                  | other                      |                      |
| arrestin, beta 1                                                         | A_51_P436727         | Cytoplasm              | other                      |                      |
| ADP-ribosyltransferase 4 (Dombrock blood group)                          | A_55_P2108248        | Nucleus                | enzyme                     |                      |
| ankyrin repeat and SOCS box containing 9                                 | A_51_P247963         | Nucleus                | transcription regulator    |                      |
| acid-sensing (proton-gated) ion channel family member 4                  | A_55_P2162747        | Plasma Membrane        | ion channel                | amiloride, amiloride |
| asparaginase                                                             | A_52_P338956         | Other                  | enzyme                     |                      |
| argininosuccinate synthase 1                                             | A_55_P2143070        | Cytoplasm              | enzyme                     |                      |
| ATPase, Na <sup>+</sup> /K <sup>+</sup> transporting, beta 1 polypeptide | A_51_P151484         | Plasma Membrane        | transporter                |                      |
| ATPase, H <sup>+</sup> transporting V0 subunit e2                        | A_51_P212038         | Cytoplasm              | enzyme                     |                      |
| ataxin 7                                                                 | A_55_P2099890        | Nucleus                | other                      |                      |
| expressed sequence AW011956                                              | A_55_P2319035        | Other                  | other                      |                      |
| expressed sequence AW549542                                              | A_55_P2274378        | Other                  | other                      |                      |
| BTB and CNC homology 1, basic leucine zipper transcription factor 2      | A_66_P114768         | Nucleus                | transcription regulator    |                      |
| 3-hydroxybutyrate dehydrogenase, type 1                                  | A_51_P163106         | Cytoplasm              | enzyme                     |                      |
| BEN domain containing 4                                                  | A_55_P2199118        | Other                  | other                      |                      |
| BPI fold containing family C                                             | A_55_P1966583        | Extracellular Space    | transporter                |                      |
| bone morphogenetic protein/retinoic acid inducible neural-specific 1     | A_55_P2124941        | Nucleus                | peptidase                  |                      |
| <b>barttin CLCNK-type chloride channel accessory beta subunit</b>        | <b>A_55_P2056704</b> | <b>Plasma Membrane</b> | <b>other</b>               |                      |
| butyrophilin, subfamily 1, member A1                                     | A_55_P2029235        | Plasma Membrane        | other                      |                      |
| chromosome 10 open reading frame 35                                      | A_51_P308029         | Other                  | other                      |                      |
| chromosome 12 open reading frame 73                                      | A_52_P598634         | Other                  | other                      |                      |
| chromosome 1 open reading frame 54                                       | A_55_P1985519        | Other                  | other                      |                      |
| complement component 2                                                   | A_51_P497985         | Extracellular Space    | peptidase                  |                      |
| RIKEN cDNA C230096K16 gene                                               | A_55_P2270412        | Other                  | other                      |                      |
| complement component 5a receptor 2                                       | A_55_P2106106        | Plasma Membrane        | G-protein coupled receptor |                      |
| chromosome 9 open reading frame 16                                       | A_51_P207153         | Other                  | other                      |                      |
| carbonic anhydrase IV                                                    | A_55_P2087182        | Plasma Membrane        | enzyme                     | ethoxzolamide, dic   |
| calbindin 1, 28kDa                                                       | A_66_P102374         | Cytoplasm              | other                      |                      |
| calmodulin-like 4                                                        | A_52_P367760         | Other                  | other                      |                      |
| calneuron 1                                                              | A_55_P2113439        | Cytoplasm              | other                      |                      |
| calcium/calmodulin-dependent protein kinase kinase 1, alpha              | A_55_P2113165        | Cytoplasm              | kinase                     |                      |
| calpain 6                                                                | A_52_P474089         | Cytoplasm              | peptidase                  |                      |
| coiled-coil domain containing 138                                        | A_55_P2043117        | Other                  | other                      |                      |
| CDC42 effector protein (Rho GTPase binding) 5                            | A_55_P2057686        | Cytoplasm              | other                      |                      |
| cadherin 6, type 2, K-cadherin (fetal kidney)                            | A_55_P2414619        | Plasma Membrane        | other                      |                      |

|                                                                                             |               |                     |                         |                      |
|---------------------------------------------------------------------------------------------|---------------|---------------------|-------------------------|----------------------|
| cyclin-dependent kinase 5, regulatory subunit 1 (p35)                                       | A_55_P2173183 | Nucleus             | kinase                  |                      |
| cyclin-dependent kinase-like 1 (CDC2-related kinase)                                        | A_51_P234140  | Nucleus             | kinase                  |                      |
| CUGBP, Elav-like family member 4                                                            | A_55_P1992572 | Nucleus             | translation regulator   |                      |
| centrosomal protein 170B                                                                    | A_55_P2050488 | Other               | other                   |                      |
| cell growth regulator with EF-hand domain 1                                                 | A_51_P372550  | Extracellular Space | other                   |                      |
| charged multivesicular body protein 4B                                                      | A_55_P2008538 | Cytoplasm           | other                   |                      |
| chondroitin polymerizing factor 2                                                           | A_55_P1987904 | Cytoplasm           | enzyme                  |                      |
| carbohydrate (N-acetylgalactosamine 4-0) sulfotransferase 8                                 | A_51_P277006  | Cytoplasm           | enzyme                  |                      |
| cell death-inducing DFFA-like effector a                                                    | A_51_P199168  | Cytoplasm           | other                   |                      |
| cell death-inducing DFFA-like effector b                                                    | A_66_P108685  | Cytoplasm           | other                   |                      |
| Cbp/p300-interacting transactivator, with Glu/Asp-rich carboxy-terminal domain, 1           | A_55_P1979833 | Nucleus             | transcription regulator |                      |
| chloride channel, voltage-sensitive Ka                                                      | A_55_P2080880 | Plasma Membrane     | ion channel             |                      |
| C-type lectin domain family 18, member B                                                    | A_55_P2063980 | Other               | other                   |                      |
| chloride intracellular channel 6                                                            | A_52_P447284  | Plasma Membrane     | ion channel             |                      |
| collagen, type I, alpha 1                                                                   | A_55_P2118520 | Extracellular Space | other                   | collagenase clostric |
| collagen, type XXVI, alpha 1                                                                | A_55_P1954271 | Extracellular Space | other                   |                      |
| collagen, type II, alpha 1                                                                  | A_55_P2004179 | Extracellular Space | other                   | collagenase clostric |
| collagen, type IV, alpha 6                                                                  | A_52_P516409  | Extracellular Space | other                   | collagenase clostric |
| collagen, type V, alpha 1                                                                   | A_51_P414637  | Extracellular Space | other                   | collagenase clostric |
| collagen, type VII, alpha 1                                                                 | A_55_P2064292 | Extracellular Space | other                   | collagenase clostric |
| collagen-like tail subunit (single strand of homotrimer) of asymmetric acetylcholinesterase | A_55_P2043337 | Extracellular Space | other                   |                      |
| cytochrome c oxidase subunit VIb polypeptide 2 (testis)                                     | A_51_P300506  | Cytoplasm           | enzyme                  |                      |
| carboxypeptidase A1 (pancreatic)                                                            | A_52_P161237  | Extracellular Space | peptidase               |                      |
| carboxypeptidase A2 (pancreatic)                                                            | A_52_P320261  | Extracellular Space | peptidase               |                      |
| carboxypeptidase B2 (plasma)                                                                | A_51_P262701  | Extracellular Space | peptidase               |                      |
| carboxypeptidase N, polypeptide 1                                                           | A_52_P308669  | Extracellular Space | peptidase               |                      |
| cellular retinoic acid binding protein 2                                                    | A_55_P2059432 | Cytoplasm           | transporter             |                      |
| crumbs family member 2                                                                      | A_51_P300618  | Extracellular Space | other                   |                      |
| cAMP responsive element binding protein 5                                                   | A_55_P2097474 | Nucleus             | transcription regulator |                      |
| collapsin response mediator protein 1                                                       | A_55_P2017600 | Cytoplasm           | enzyme                  |                      |
| chondroitin sulfate proteoglycan 5 (neuroglycan C)                                          | A_55_P2046744 | Extracellular Space | growth factor           |                      |
| cubilin (intrinsic factor-cobalamin receptor)                                               | A_55_P2047639 | Plasma Membrane     | transmembrane receptor  |                      |
| cytochrome b561                                                                             | A_55_P1954718 | Cytoplasm           | enzyme                  |                      |
| cytochrome b5 reductase 4                                                                   | A_52_P505827  | Cytoplasm           | enzyme                  |                      |
| cytochrome P450, family 26, subfamily B, polypeptide 1                                      | A_51_P501844  | Cytoplasm           | enzyme                  |                      |
| cytochrome P450, family 2, subfamily d, polypeptide 26                                      | A_51_P120295  | Cytoplasm           | enzyme                  |                      |
| cytochrome P450, family 2, subfamily U, polypeptide 1                                       | A_55_P1966734 | Cytoplasm           | enzyme                  |                      |
| cytochrome P450, family 4, subfamily A, polypeptide 11                                      | A_55_P2050628 | Cytoplasm           | enzyme                  |                      |
| RIKEN cDNA D230019N24 gene                                                                  | A_55_P2208260 | Other               | other                   |                      |
| RIKEN cDNA D230040J21 gene                                                                  | A_55_P2261882 | Other               | other                   |                      |
| RIKEN cDNA D430019H16 gene                                                                  | A_52_P97699   | Other               | other                   |                      |
| DNA segment, Chr 8, ERATO Doi 158, expressed                                                | A_55_P2236382 | Other               | other                   |                      |
| D-amino-acid oxidase                                                                        | A_55_P2108933 | Cytoplasm           | enzyme                  |                      |
| death associated protein-like 1                                                             | A_51_P391955  | Other               | other                   |                      |
| DDB1 and CUL4 associated factor 12-like 2                                                   | A_55_P2084980 | Other               | other                   |                      |
| doublecortin                                                                                | A_52_P244349  | Cytoplasm           | other                   |                      |
| dicarbonyl/L-xylulose reductase                                                             | A_55_P2077628 | Cytoplasm           | enzyme                  |                      |
| dopa decarboxylase (aromatic L-amino acid decarboxylase)                                    | A_55_P2110497 | Cytoplasm           | enzyme                  | carbidopa/entacapoc  |
| DENN/MADD domain containing 4A                                                              | A_55_P2048650 | Nucleus             | other                   |                      |
| deoxyribose-phosphate aldolase (putative)                                                   | A_51_P512820  | Cytoplasm           | enzyme                  |                      |
| dickkopf WNT signaling pathway inhibitor 3                                                  | A_55_P2083609 | Extracellular Space | cytokine                |                      |
| discs, large (Drosophila) homolog-associated protein 3                                      | A_52_P138806  | Cytoplasm           | other                   |                      |
| delta-like 1 homolog (Drosophila)                                                           | A_66_P117477  | Extracellular Space | other                   |                      |
| delta-like 1 (Drosophila)                                                                   | A_51_P306017  | Plasma Membrane     | enzyme                  |                      |
| dematin actin binding protein                                                               | A_55_P1956482 | Plasma Membrane     | other                   |                      |
| DnaJ (Hsp40) homolog, subfamily A, member 4                                                 | A_55_P2085546 | Nucleus             | other                   |                      |
| DnaJ (Hsp40) homolog, subfamily C, member 19                                                | A_55_P2028243 | Cytoplasm           | other                   |                      |
| DnaJ (Hsp40) homolog, subfamily C, member 22                                                | A_51_P257743  | Other               | other                   |                      |
| dedicator of cytokinesis 5                                                                  | A_52_P88983   | Cytoplasm           | other                   |                      |
| D4, zinc and double PHD fingers family 1                                                    | A_51_P131442  | Nucleus             | other                   |                      |
| dipeptidyl-peptidase 4                                                                      | A_51_P467110  | Plasma Membrane     | peptidase               | saxagliptin, talabos |
| dihydropyrimidinase-like 5                                                                  | A_55_P2052555 | Cytoplasm           | enzyme                  |                      |
| double homeobox B-like 1                                                                    | A_66_P125035  | Nucleus             | other                   |                      |
| dynein, cytoplasmic 1, intermediate chain 1                                                 | A_55_P2090429 | Cytoplasm           | other                   |                      |
| ectodysplasin-A                                                                             | A_55_P2030662 | Other               | other                   |                      |
| epidermal growth factor receptor                                                            | A_52_P106259  | Plasma Membrane     | kinase                  | cetuximab, AEE 78    |
| euchromatic histone-lysine N-methyltransferase 1                                            | A_55_P2045163 | Nucleus             | transcription regulator |                      |
| eukaryotic translation initiation factor 2, subunit 3, structural gene Y-linked             | A_55_P2011877 | Other               | other                   |                      |
| E74-like factor 5                                                                           | A_51_P455866  | Other               | other                   |                      |
| elastin microfibril interfacier 2                                                           | A_52_P527800  | Extracellular Space | other                   |                      |
| endonuclease V                                                                              | A_55_P1954925 | Other               | enzyme                  |                      |
| enolase 2 (gamma, neuronal)                                                                 | A_55_P2019457 | Cytoplasm           | enzyme                  |                      |

|                                                                                   |               |                     |                            |                      |
|-----------------------------------------------------------------------------------|---------------|---------------------|----------------------------|----------------------|
| glutamyl aminopeptidase (aminopeptidase A)                                        | A_51_P161830  | Plasma Membrane     | peptidase                  |                      |
| erythrocyte membrane protein band 4.1 like 4B                                     | A_52_P286098  | Other               | transporter                |                      |
| EPH receptor A5                                                                   | A_55_P2062911 | Plasma Membrane     | kinase                     |                      |
| EPH receptor B3                                                                   | A_55_P2054332 | Plasma Membrane     | kinase                     |                      |
| epoxide hydrolase 1, microsomal (xenobiotic)                                      | A_55_P2002578 | Cytoplasm           | peptidase                  |                      |
| epidermal growth factor receptor pathway substrate 8                              | A_55_P1982454 | Plasma Membrane     | peptidase                  |                      |
| espin                                                                             | A_66_P108003  | Cytoplasm           | other                      |                      |
| estrogen-related receptor gamma                                                   | A_65_P19089   | Nucleus             | ligand-dependent n         | diethylstilbestrol   |
| exocyst complex component 6                                                       | A_52_P631499  | Plasma Membrane     | transporter                |                      |
| exosome component 9                                                               | A_55_P2043187 | Nucleus             | enzyme                     |                      |
| EYA transcriptional coactivator and phosphatase 1                                 | A_55_P2423586 | Nucleus             | phosphatase                |                      |
| fatty acid binding protein 3, muscle and heart (mammary-derived growth inhibitor) | A_55_P2033780 | Cytoplasm           | transporter                |                      |
| family with sequence similarity 160, member B2                                    | A_55_P2088296 | Other               | other                      |                      |
| family with sequence similarity 219, member A                                     | A_55_P1991778 | Other               | other                      |                      |
| fibrillin 1                                                                       | A_51_P467224  | Extracellular Space | other                      |                      |
| fructose-1,6-bisphosphatase 1                                                     | A_51_P474701  | Cytoplasm           | phosphatase                |                      |
| F-box and leucine-rich repeat protein 16                                          | A_52_P49457   | Cytoplasm           | other                      |                      |
| F-box and leucine-rich repeat protein 7                                           | A_52_P423364  | Cytoplasm           | enzyme                     |                      |
| FCH domain only 1                                                                 | A_55_P2047461 | Plasma Membrane     | other                      |                      |
| FCH and double SH3 domains 1                                                      | A_52_P456158  | Other               | other                      |                      |
| fibrinogen beta chain                                                             | A_51_P428483  | Extracellular Space | other                      | F2                   |
| fibroblast growth factor 1 (acidic)                                               | A_55_P2047188 | Extracellular Space | growth factor              | pentosan polysulfat  |
| FIG4 phosphoinositide 5-phosphatase                                               | A_51_P405985  | Cytoplasm           | enzyme                     |                      |
| fibronectin leucine rich transmembrane protein 1                                  | A_55_P2110915 | Plasma Membrane     | other                      |                      |
| fibronectin leucine rich transmembrane protein 3                                  | A_55_P2110925 | Plasma Membrane     | other                      |                      |
| fibronectin 1                                                                     | A_55_P2130178 | Extracellular Space | enzyme                     | ocriplasmin          |
| formin binding protein 1                                                          | A_55_P2030775 | Nucleus             | enzyme                     |                      |
| folate receptor 1 (adult)                                                         | A_55_P197792  | Plasma Membrane     | transporter                |                      |
| forkhead box D1                                                                   | A_52_P128134  | Nucleus             | transcription regulator    |                      |
| forkhead box I1                                                                   | A_55_P2166513 | Nucleus             | transcription regulator    |                      |
| forkhead box O6                                                                   | A_52_P589568  | Nucleus             | transcription regulator    |                      |
| forkhead box P4                                                                   | A_55_P2149983 | Nucleus             | transcription regulator    |                      |
| FRAS1 related extracellular matrix 1                                              | A_55_P1999641 | Extracellular Space | other                      |                      |
| FERM and PDZ domain containing 2                                                  | A_55_P2173664 | Plasma Membrane     | other                      |                      |
| frizzled-related protein                                                          | A_51_P286748  | Extracellular Space | other                      |                      |
| follistatin                                                                       | A_55_P2394308 | Extracellular Space | other                      |                      |
| FXYD domain-containing ion transport regulator 2                                  | A_55_P2137941 | Plasma Membrane     | other                      |                      |
| frizzled class receptor 10                                                        | A_52_P203560  | Plasma Membrane     | G-protein coupled receptor |                      |
| gamma-aminobutyric acid (GABA) A receptor, alpha 3                                | A_55_P1963463 | Plasma Membrane     | ion channel                | methohexital, primid |
| galanin/GMAP prepropeptide                                                        | A_51_P258281  | Extracellular Space | other                      |                      |
| GTPase activating Rap/RanGAP domain-like 3                                        | A_55_P2114133 | Other               | other                      |                      |
| GATS protein-like 2                                                               | A_55_P2014987 | Other               | other                      |                      |
| group-specific component (vitamin D binding protein)                              | A_55_P2022158 | Extracellular Space | transporter                |                      |
| glucosaminyl (N-acetyl) transferase 1, core 2                                     | A_52_P21550   | Cytoplasm           | enzyme                     |                      |
| GDNF family receptor alpha 2                                                      | A_55_P1968703 | Plasma Membrane     | transmembrane receptor     |                      |
| GDNF family receptor alpha 3                                                      | A_55_P1984103 | Plasma Membrane     | transmembrane receptor     |                      |
| gamma-glutamyltransferase 1                                                       | A_51_P468073  | Plasma Membrane     | enzyme                     |                      |
| GIPC PDZ domain containing family, member 2                                       | A_51_P446131  | Cytoplasm           | other                      |                      |
| galactosidase, alpha                                                              | A_55_P2146136 | Cytoplasm           | enzyme                     |                      |
| predicted gene 10576                                                              | A_55_P2090782 | Other               | other                      |                      |
| predicted gene 12258                                                              | A_55_P2115260 | Other               | other                      |                      |
| high mobility group box 1                                                         | A_55_P2025153 | Nucleus             | transcription regulator    |                      |
| predicted gene 266                                                                | A_55_P2073694 | Other               | other                      |                      |
| predicted gene 5097                                                               | A_55_P2067952 | Other               | other                      |                      |
| high mobility group box 2 pseudogene                                              | A_52_P30877   | Other               | other                      |                      |
| predicted gene 6115                                                               | A_55_P2176917 | Other               | other                      |                      |
| predicted gene 6213                                                               | A_52_P900300  | Other               | other                      |                      |
| predicted gene 6994                                                               | A_55_P1993640 | Other               | other                      |                      |
| predicted gene 9780                                                               | A_55_P1966332 | Other               | other                      |                      |
| predicted gene 9900                                                               | A_55_P2005315 | Other               | other                      |                      |
| guanine nucleotide binding protein (G protein), beta 5                            | A_55_P2000643 | Plasma Membrane     | enzyme                     |                      |
| guanine nucleotide binding protein (G protein), gamma 7                           | A_55_P1988018 | Plasma Membrane     | enzyme                     |                      |
| glycerol-3-phosphate dehydrogenase 1 (soluble)                                    | A_52_P16419   | Cytoplasm           | enzyme                     |                      |
| G protein-coupled receptor associated sorting protein 1                           | A_55_P2132902 | Cytoplasm           | transporter                |                      |
| glutamate receptor, ionotropic, AMPA 4                                            | A_55_P1987725 | Plasma Membrane     | ion channel                | talampanel, faramp   |
| glutathione S-transferase alpha 5                                                 | A_55_P2170454 | Cytoplasm           | enzyme                     |                      |
| glutathione S-transferase mu 5                                                    | A_55_P2062190 | Cytoplasm           | enzyme                     |                      |
| glutathione S-transferase, mu 6                                                   | A_55_P2031692 | Cytoplasm           | enzyme                     |                      |
| GULP, engulfment adaptor PTB domain containing 1                                  | A_51_P381218  | Cytoplasm           | other                      |                      |
| glucoside xylosyltransferase 2                                                    | A_55_P1974542 | Other               | other                      |                      |
| histocompatibility 2, K region locus 2                                            | A_51_P502456  | Plasma Membrane     | other                      |                      |
| histocompatibility 2, Q region locus 5                                            | A_51_P400752  | Other               | other                      |                      |

|                                                                              |                     |                     |                                |                      |
|------------------------------------------------------------------------------|---------------------|---------------------|--------------------------------|----------------------|
| hydroxyacylglutathione hydrolase                                             | A_55_P2154536       | Cytoplasm           | enzyme                         |                      |
| huntingtin-associated protein 1                                              | A_51_P516728        | Cytoplasm           | other                          |                      |
| hyaluronan synthase 2                                                        | A_51_P213359        | Plasma Membrane     | enzyme                         |                      |
| histidine decarboxylase                                                      | A_51_P254656        | Cytoplasm           | enzyme                         |                      |
| HD domain containing 3                                                       | A_52_P521882        | Other               | other                          |                      |
| HECT, C2 and WW domain containing E3 ubiquitin protein ligase 1              | A_55_P2424767       | Cytoplasm           | enzyme                         |                      |
| hemogen                                                                      | A_55_P1975660       | Nucleus             | other                          |                      |
| <b>hes family bHLH transcription factor 5</b>                                | <b>A_52_P622850</b> | <b>Nucleus</b>      | <b>other</b>                   |                      |
| <b>hes-related family bHLH transcription factor with YRPW motif 1</b>        | <b>A_51_P258409</b> | <b>Nucleus</b>      | <b>transcription regulator</b> |                      |
| hedgehog interacting protein                                                 | A_55_P1969276       | Plasma Membrane     | other                          |                      |
| major histocompatibility complex, class I, A                                 | A_51_P198434        | Plasma Membrane     | other                          |                      |
| major histocompatibility complex, class I, E                                 | A_51_P237754        | Plasma Membrane     | transmembrane receptor         |                      |
| HMP19 protein                                                                | A_51_P163953        | Cytoplasm           | other                          |                      |
| HNF1 homeobox A                                                              | A_55_P1970929       | Nucleus             | transcription regulator        |                      |
| hepatocyte nuclear factor 4, alpha                                           | A_55_P1959633       | Nucleus             | transcription regulator        |                      |
| homeobox C4                                                                  | A_55_P2074688       | Nucleus             | transcription regulator        |                      |
| homeobox D12                                                                 | A_55_P2160638       | Nucleus             | transcription regulator        |                      |
| homeobox D4                                                                  | A_51_P260265        | Nucleus             | transcription regulator        |                      |
| hydroxysteroid (17-beta) dehydrogenase 14                                    | A_55_P2056774       | Cytoplasm           | enzyme                         |                      |
| hydroxy-delta-5-steroid dehydrogenase, 3 beta- and steroid delta-isomerase 4 | A_55_P1969665       | Cytoplasm           | enzyme                         |                      |
| RIKEN cDNA I730030J21 gene                                                   | A_55_P1973399       | Other               | other                          |                      |
| interferon induced transmembrane protein 7                                   | A_55_P2097161       | Other               | other                          |                      |
| immunoglobulin superfamily, DCC subclass, member 3                           | A_51_P179921        | Other               | other                          |                      |
| immunoglobulin superfamily, DCC subclass, member 4                           | A_55_P2001553       | Plasma Membrane     | other                          |                      |
| insulin-like growth factor binding protein 1                                 | A_51_P447545        | Extracellular Space | other                          |                      |
| interleukin 15 receptor, alpha                                               | A_55_P2060707       | Plasma Membrane     | transmembrane receptor         |                      |
| interleukin 33                                                               | A_55_P1964960       | Extracellular Space | cytokine                       |                      |
| importin 9                                                                   | A_65_P15675         | Nucleus             | transporter                    |                      |
| iroquois homeobox 1                                                          | A_52_P1092823       | Nucleus             | transcription regulator        |                      |
| inter-alpha-trypsin inhibitor heavy chain family, member 5                   | A_55_P2077048       | Other               | other                          |                      |
| inositol-trisphosphate 3-kinase A                                            | A_51_P273609        | Cytoplasm           | kinase                         |                      |
| intersectin 1 (SH3 domain protein)                                           | A_55_P1994603       | Cytoplasm           | other                          |                      |
| jade family PHD finger 2                                                     | A_55_P2139753       | Nucleus             | other                          |                      |
| KN motif and ankyrin repeat domains 2                                        | A_55_P2167112       | Nucleus             | transcription regulator        |                      |
| Kazal-type serine peptidase inhibitor domain 1                               | A_55_P2015032       | Extracellular Space | other                          |                      |
| potassium voltage-gated channel, shaker-related subfamily, member 4          | A_55_P2084251       | Plasma Membrane     | ion channel                    | nicorandil, amiodar  |
| potassium voltage-gated channel, Shal-related subfamily, member 2            | A_52_P124472        | Plasma Membrane     | ion channel                    | dalfampridine        |
| potassium inwardly-rectifying channel, subfamily J, member 1                 | A_52_P499907        | Plasma Membrane     | ion channel                    | glimepiride/rosiglit |
| kieliiin/chordin-like protein                                                | A_55_P2074499       | Extracellular Space | other                          |                      |
| KIAA1467                                                                     | A_55_P1975947       | Other               | other                          |                      |
| kinesin family member 1A                                                     | A_52_P49378         | Cytoplasm           | other                          |                      |
| kinesin family member 21B                                                    | A_52_P282500        | Cytoplasm           | other                          |                      |
| kinesin family member 5C                                                     | A_55_P2048937       | Cytoplasm           | other                          |                      |
| kinesin family member C2                                                     | A_55_P2149500       | Cytoplasm           | other                          |                      |
| kinesin light chain 2                                                        | A_55_P2002918       | Cytoplasm           | other                          |                      |
| keratin 36                                                                   | A_55_P2140036       | Cytoplasm           | other                          |                      |
| like-glycosyltransferase                                                     | A_55_P2069979       | Cytoplasm           | enzyme                         |                      |
| LIM domain binding 2                                                         | A_55_P2013601       | Nucleus             | transcription regulator        |                      |
| low density lipoprotein receptor class A domain containing 3                 | A_55_P2054728       | Plasma Membrane     | other                          |                      |
| <b>LIM homeobox 1</b>                                                        | <b>A_52_P652336</b> | <b>Nucleus</b>      | <b>transcription regulator</b> |                      |
| LIM domain kinase 1                                                          | A_55_P1966987       | Cytoplasm           | kinase                         | dabrafenib, dabraf   |
| uncharacterized LOC102635467                                                 | A_55_P2068496       | Other               | other                          |                      |
| uncharacterized LOC102638978                                                 | A_55_P1972915       | Other               | other                          |                      |
| h-2 class I histocompatibility antigen, D-37 alpha chain-like                | A_55_P1972481       | Other               | other                          |                      |
| high mobility group protein B1-like                                          | A_55_P1991911       | Other               | other                          |                      |
| lipin 2                                                                      | A_66_P138976        | Nucleus             | phosphatase                    |                      |
| low density lipoprotein receptor-related protein 11                          | A_51_P295237        | Other               | other                          |                      |
| low density lipoprotein receptor-related protein 2                           | A_52_P285470        | Plasma Membrane     | transporter                    |                      |
| leucine rich repeat containing 31                                            | A_55_P2078994       | Other               | other                          |                      |
| leucine rich repeat containing 4B                                            | A_55_P1953503       | Plasma Membrane     | other                          |                      |
| LUC7-like 2 (S. cerevisiae)                                                  | A_55_P1953361       | Other               | other                          |                      |
| lymphocyte antigen 6 complex, locus A                                        | A_51_P265495        | Plasma Membrane     | other                          |                      |
| lymphocyte antigen 86                                                        | A_51_P465350        | Plasma Membrane     | other                          |                      |
| leucine zipper, putative tumor suppressor 1                                  | A_55_P2261772       | Nucleus             | transcription regulator        |                      |
| MAP-kinase activating death domain                                           | A_55_P2112424       | Cytoplasm           | other                          |                      |
| v-maf avian musculoaponeurotic fibrosarcoma oncogene homolog B               | A_52_P495869        | Nucleus             | other                          |                      |
| metastasis associated lung adenocarcinoma transcript 1 (non-protein coding)  | A_55_P2021187       | Nucleus             | other                          |                      |
| MAP/microtubule affinity-regulating kinase 4                                 | A_55_P2142580       | Cytoplasm           | kinase                         |                      |
| Mab-21 domain containing 1                                                   | A_66_P137605        | Cytoplasm           | other                          |                      |
| methyl-CpG binding domain protein 1                                          | A_55_P2105843       | Nucleus             | transcription regulator        |                      |
| melanoma cell adhesion molecule                                              | A_55_P1986552       | Plasma Membrane     | other                          |                      |
| multiple C2 domains, transmembrane 2                                         | A_55_P1965313       | Other               | other                          |                      |



|                                                                                                           |                      |                        |                                  |                       |
|-----------------------------------------------------------------------------------------------------------|----------------------|------------------------|----------------------------------|-----------------------|
| MyoD family inhibitor                                                                                     | A_55_P2076777        | Cytoplasm              | other                            |                       |
| malic enzyme 3, NADP(+)-dependent, mitochondrial                                                          | A_55_P1953919        | Cytoplasm              | enzyme                           |                       |
| mesenteric estrogen-dependent adipogenesis                                                                | A_55_P2065731        | Cytoplasm              | other                            |                       |
| myocyte enhancer factor 2A                                                                                | A_55_P1985159        | Nucleus                | transcription regulator          |                       |
| maternally expressed 3                                                                                    | A_55_P2033407        | Other                  | other                            |                       |
| <b>mesenchyme homeobox 2</b>                                                                              | <b>A_51_P383001</b>  | <b>Nucleus</b>         | <b>transcription regulator</b>   |                       |
| meprin A, alpha (PABA peptide hydrolase)                                                                  | A_55_P2067707        | Plasma Membrane        | peptidase                        |                       |
| meprin A, beta                                                                                            | A_55_P2220748        | Plasma Membrane        | peptidase                        |                       |
| meningioma expressed antigen 5 (hyaluronidase)                                                            | A_55_P2333126        | Cytoplasm              | enzyme                           |                       |
| mindbomb E3 ubiquitin protein ligase 2                                                                    | A_55_P1963900        | Nucleus                | transcription regulator          |                       |
| mast cell immunoglobulin like receptor 1                                                                  | A_55_P2109485        | Plasma Membrane        | other                            |                       |
| myeloid leukemia factor 1                                                                                 | A_51_P205106         | Nucleus                | other                            |                       |
| MLX interacting protein-like                                                                              | A_55_P2119957        | Nucleus                | transcription regulator          |                       |
| MMS22-like, DNA repair protein                                                                            | A_55_P2044364        | Nucleus                | other                            |                       |
| meningioma (disrupted in balanced translocation) 1                                                        | A_55_P2174935        | Nucleus                | other                            |                       |
| membrane-spanning 4-domains, subfamily A, member 4B                                                       | A_55_P2135980        | Plasma Membrane        | other                            |                       |
| mitochondrial fission regulator 2                                                                         | A_55_P1997300        | Cytoplasm              | other                            |                       |
| <b>v-myc avian myelocytomatosis viral oncogene homolog</b>                                                | <b>A_52_P108346</b>  | <b>Nucleus</b>         | <b>transcription regulator</b>   |                       |
| myosin, heavy chain 7, cardiac muscle, beta                                                               | A_55_P2093232        | Cytoplasm              | enzyme                           |                       |
| neuron navigator 1                                                                                        | A_52_P201551         | Other                  | enzyme                           |                       |
| nucleolin                                                                                                 | A_52_P620748         | Nucleus                | other                            |                       |
| NADPH dependent diflavin oxidoreductase 1                                                                 | A_55_P2082604        | Cytoplasm              | enzyme                           |                       |
| NDRG family member 4                                                                                      | A_55_P2019483        | Other                  | other                            |                       |
| negative elongation factor complex member C/D                                                             | A_55_P1982156        | Nucleus                | other                            |                       |
| NEL-like 1 (chicken)                                                                                      | A_55_P1967500        | Extracellular Space    | growth factor                    |                       |
| neutralized E3 ubiquitin protein ligase 1B                                                                | A_55_P2011727        | Other                  | other                            |                       |
| nuclear factor I/B                                                                                        | A_55_P2086682        | Nucleus                | transcription regulator          |                       |
| NME/NM23 family member 5                                                                                  | A_55_P1966102        | Other                  | kinase                           |                       |
| neuropeptide B                                                                                            | A_55_P1952076        | Extracellular Space    | other                            |                       |
| neuronal pentraxin chromo domain                                                                          | A_55_P2147846        | Plasma Membrane        | other                            |                       |
| <b>nephrosis 2, idiopathic, steroid-resistant (podocin)</b>                                               | <b>A_55_P1996484</b> | <b>Plasma Membrane</b> | <b>other</b>                     |                       |
| neurensin 1                                                                                               | A_51_P448784         | Plasma Membrane        | other                            |                       |
| 5'-nucleotidase domain containing 3                                                                       | A_51_P507023         | Other                  | other                            |                       |
| neurotensin receptor 1 (high affinity)                                                                    | A_55_P2005655        | Plasma Membrane        | G-protein coupled r contulakin-G |                       |
| neurexophilin 3                                                                                           | A_51_P254262         | Extracellular Space    | other                            |                       |
| oncomodulin                                                                                               | A_55_P2073825        | Cytoplasm              | other                            |                       |
| 2-oxoglutarate and iron-dependent oxygenase domain containing 1                                           | A_55_P2063166        | Other                  | other                            |                       |
| <b>odd-skipped related transcription factor 2</b>                                                         | <b>A_51_P499599</b>  | <b>Nucleus</b>         | <b>transcription regulator</b>   |                       |
| p21 protein (Cdc42/Rac)-activated kinase 4                                                                | A_55_P2117731        | Cytoplasm              | kinase                           |                       |
| PAP associated domain containing 5                                                                        | A_55_P1996988        | Nucleus                | enzyme                           |                       |
| progesterin and adipoQ receptor family member V                                                           | A_52_P421344         | Other                  | other                            |                       |
| progesterin and adipoQ receptor family member VI                                                          | A_55_P1971025        | Plasma Membrane        | other                            |                       |
| par-3 family cell polarity regulator                                                                      | A_55_P1985015        | Plasma Membrane        | other                            |                       |
| parkin RBR E3 ubiquitin protein ligase                                                                    | A_55_P1978226        | Cytoplasm              | enzyme                           |                       |
| phenazine biosynthesis-like protein domain containing                                                     | A_55_P1956063        | Cytoplasm              | enzyme                           |                       |
| <b>pre-B-cell leukemia homeobox 1</b>                                                                     | <b>A_55_P1953998</b> | <b>Nucleus</b>         | <b>transcription regulator</b>   |                       |
| protocadherin 17                                                                                          | A_52_P111031         | Other                  | other                            |                       |
| protocadherin 19                                                                                          | A_52_P432969         | Extracellular Space    | other                            |                       |
| protocadherin 8                                                                                           | A_51_P274488         | Plasma Membrane        | other                            |                       |
| piccolo presynaptic cytomatrix protein                                                                    | A_55_P2014755        | Cytoplasm              | transporter                      |                       |
| Purkinje cell protein 4                                                                                   | A_51_P253984         | Cytoplasm              | other                            |                       |
| proprotein convertase subtilisin/kexin type 2                                                             | A_51_P229613         | Extracellular Space    | peptidase                        |                       |
| proprotein convertase subtilisin/kexin type 9                                                             | A_51_P397673         | Extracellular Space    | peptidase                        |                       |
| pyruvate dehydrogenase (lipoamide) beta                                                                   | A_55_P1953972        | Cytoplasm              | enzyme                           |                       |
| pyruvate dehydrogenase phosphatase catalytic subunit 1                                                    | A_55_P2033055        | Cytoplasm              | phosphatase                      |                       |
| PDZ domain containing 1                                                                                   | A_65_P16483          | Plasma Membrane        | transporter                      |                       |
| pseudopodium-enriched atypical kinase 1                                                                   | A_55_P2154307        | Plasma Membrane        | kinase                           |                       |
| PERP, TP53 apoptosis effector                                                                             | A_51_P317941         | Plasma Membrane        | other                            |                       |
| phosphoglucomutase 2-like 1                                                                               | A_55_P2150108        | Cytoplasm              | enzyme                           |                       |
| phosphatidylinositol glycan anchor biosynthesis, class T                                                  | A_55_P1987439        | Cytoplasm              | enzyme                           |                       |
| pipecolic acid oxidase                                                                                    | A_51_P337195         | Cytoplasm              | enzyme                           |                       |
| pleckstrin homology domain containing, family G (with RhoGef domain) member 3                             | A_55_P1974961        | Other                  | other                            |                       |
| paraneoplastic Ma antigen 2                                                                               | A_52_P596595         | Nucleus                | transporter                      |                       |
| protection of telomeres 1                                                                                 | A_55_P2115458        | Nucleus                | other                            |                       |
| POU domain, class 3, transcription factor 1                                                               | A_55_P1961152        | Nucleus                | transcription regulator          |                       |
| protein tyrosine phosphatase, receptor type, f polypeptide (PTPRF), interacting protein (liprin), alpha 4 | A_55_P1963002        | Plasma Membrane        | other                            |                       |
| protein phosphatase, Mg2+/Mn2+ dependent, 1K                                                              | A_55_P1968606        | Cytoplasm              | phosphatase                      |                       |
| protein phosphatase 1, regulatory subunit 13B                                                             | A_55_P1973965        | Cytoplasm              | phosphatase                      |                       |
| protein phosphatase 1, regulatory subunit 3B                                                              | A_55_P1967133        | Cytoplasm              | other                            |                       |
| protein kinase C, alpha                                                                                   | A_66_P105791         | Cytoplasm              | kinase                           | L-threo-safingol, inç |
| protein kinase C, beta                                                                                    | A_65_P20249          | Cytoplasm              | kinase                           | enzastaurin, ruboxi   |
| pregnancy specific glycoprotein 18                                                                        | A_55_P2067741        | Extracellular Space    | other                            |                       |

|                                                                                                        |               |                     |                         |                      |
|--------------------------------------------------------------------------------------------------------|---------------|---------------------|-------------------------|----------------------|
| proteasome (prosome, macropain) activator subunit 3 (PA28 gamma; Ki)                                   | A_55_P2020572 | Cytoplasm           | peptidase               |                      |
| protein tyrosine phosphatase, non-receptor type 5 (striatum-enriched)                                  | A_55_P1955726 | Plasma Membrane     | phosphatase             |                      |
| protein tyrosine phosphatase, receptor type, O                                                         | A_55_P2227355 | Plasma Membrane     | phosphatase             |                      |
| protein tyrosine phosphatase, receptor type, S                                                         | A_55_P1991985 | Plasma Membrane     | phosphatase             |                      |
| quinolinate phosphoribosyltransferase                                                                  | A_51_P394014  | Cytoplasm           | enzyme                  | atorvastatin/niacin, |
| R3H domain containing-like                                                                             | A_55_P2096545 | Other               | other                   |                      |
| RAB3B, member RAS oncogene family                                                                      | A_55_P2125311 | Cytoplasm           | enzyme                  |                      |
| RAB43, member RAS oncogene family                                                                      | A_65_P09032   | Cytoplasm           | enzyme                  |                      |
| RAD51 paralogue C                                                                                      | A_55_P1955891 | Nucleus             | enzyme                  |                      |
| Ral GEF with PH domain and SH3 binding motif 1                                                         | A_55_P2094626 | Cytoplasm           | other                   |                      |
| RNA binding protein, fox-1 homolog (C. elegans) 1                                                      | A_55_P1953400 | Cytoplasm           | other                   |                      |
| RNA binding motif protein 47                                                                           | A_55_P1959305 | Other               | other                   |                      |
| ret proto-oncogene                                                                                     | A_55_P2160676 | Plasma Membrane     | kinase                  | sunitinib, motesanil |
| regulator of G-protein signaling 10                                                                    | A_51_P218774  | Cytoplasm           | other                   |                      |
| ribosomal modification protein rimK-like family member A                                               | A_52_P69194   | Cytoplasm           | other                   |                      |
| regulating synaptic membrane exocytosis 3                                                              | A_55_P2143251 | Plasma Membrane     | other                   |                      |
| Ras and Rab interactor 2                                                                               | A_55_P2013996 | Cytoplasm           | other                   |                      |
| receptor-interacting serine-threonine kinase 3                                                         | A_51_P491987  | Plasma Membrane     | kinase                  |                      |
| rippy transcriptional repressor 2                                                                      | A_66_P125741  | Nucleus             | other                   |                      |
| ribonuclease, RNase A family, 4                                                                        | A_51_P237383  | Extracellular Space | enzyme                  |                      |
| ring finger protein 213                                                                                | A_51_P159503  | Cytoplasm           | enzyme                  |                      |
| roundabout, axon guidance receptor, homolog 2 (Drosophila)                                             | A_55_P2083929 | Plasma Membrane     | transmembrane receptor  |                      |
| receptor tyrosine kinase-like orphan receptor 2                                                        | A_66_P131398  | Plasma Membrane     | kinase                  |                      |
| rabphilin 3A-like (without C2 domains)                                                                 | A_55_P2027157 | Plasma Membrane     | other                   |                      |
| radial spoke head 1 homolog (Chlamydomonas)                                                            | A_55_P2044684 | Nucleus             | other                   |                      |
| receptor (chemosensory) transporter protein 4                                                          | A_51_P304170  | Plasma Membrane     | other                   |                      |
| run-related transcription factor 1; translocated to, 1 (cyclin D-related)                              | A_52_P612137  | Nucleus             | transcription regulator |                      |
| S100 calcium binding protein G                                                                         | A_55_P2013236 | Cytoplasm           | other                   |                      |
| Sin3A-associated protein, 25kDa                                                                        | A_52_P38964   | Other               | other                   |                      |
| sodium channel, voltage gated, type VIII, alpha subunit                                                | A_55_P2057132 | Plasma Membrane     | ion channel             | riluzole             |
| secretin                                                                                               | A_51_P234359  | Extracellular Space | other                   |                      |
| signal peptide, CUB domain, EGF-like 1                                                                 | A_55_P2299524 | Plasma Membrane     | transmembrane receptor  |                      |
| scleraxis basic helix-loop-helix transcription factor                                                  | A_51_P380432  | Nucleus             | other                   |                      |
| sema domain, immunoglobulin domain (Ig), transmembrane domain (TM) and short cytoplasmic doma          | A_55_P1953866 | Plasma Membrane     | other                   |                      |
| sema domain, immunoglobulin domain (Ig), transmembrane domain (TM) and short cytoplasmic doma          | A_51_P331003  | Plasma Membrane     | other                   |                      |
| sema domain, transmembrane domain (TM), and cytoplasmic domain, (semaphorin) 6C                        | A_55_P2156126 | Plasma Membrane     | other                   |                      |
| sema domain, transmembrane domain (TM), and cytoplasmic domain, (semaphorin) 6D                        | A_55_P2125351 | Plasma Membrane     | other                   |                      |
| septa 3                                                                                                | A_55_P2072110 | Cytoplasm           | enzyme                  |                      |
| serpin peptidase inhibitor, clade A (alpha-1 antiprotease, antitrypsin), member 1                      | A_55_P2165414 | Extracellular Space | other                   |                      |
| serpin peptidase inhibitor, clade B (ovalbumin), member 8                                              | A_55_P2027012 | Cytoplasm           | other                   |                      |
| serpin peptidase inhibitor, clade F (alpha-2 antiplasmin, pigment epithelium derived factor), member 2 | A_55_P1956497 | Extracellular Space | other                   |                      |
| serum/glucocorticoid regulated kinase 2                                                                | A_55_P2042923 | Cytoplasm           | kinase                  |                      |
| N-sulfoglucosamine sulfohydrolase                                                                      | A_55_P2028571 | Cytoplasm           | enzyme                  |                      |
| shisa family member 2                                                                                  | A_51_P408649  | Other               | other                   |                      |
| src kinase associated phosphoprotein 1                                                                 | A_55_P2059110 | Cytoplasm           | kinase                  |                      |
| selection and upkeep of intraepithelial T cells 8                                                      | A_55_P2120388 | Other               | other                   |                      |
| solute carrier family 14 (urea transporter), member 2                                                  | A_55_P1964028 | Plasma Membrane     | transporter             |                      |
| solute carrier family 1 (glutamate/neutral amino acid transporter), member 4                           | A_55_P2109589 | Plasma Membrane     | transporter             | riluzole             |
| solute carrier family 22 (organic anion transporter), member 6                                         | A_51_P360655  | Plasma Membrane     | transporter             | colchicine/probenex  |
| solute carrier family 23, member 3                                                                     | A_55_P1964752 | Other               | transporter             |                      |
| solute carrier family 26 (anion exchanger), member 11                                                  | A_51_P113403  | Cytoplasm           | transporter             |                      |
| solute carrier family 29 (equilibrative nucleoside transporter), member 4                              | A_55_P2048119 | Plasma Membrane     | transporter             |                      |
| Slc2a4 regulator, pseudogene                                                                           | A_55_P2293351 | Other               | other                   |                      |
| solute carrier family 32 (GABA vesicular transporter), member 1                                        | A_52_P138926  | Plasma Membrane     | transporter             | tiagabine            |
| solute carrier family 34 (type II sodium/phosphate cotransporter), member 1                            | A_51_P498442  | Plasma Membrane     | transporter             |                      |
| solute carrier family 35, member G1                                                                    | A_55_P1959828 | Plasma Membrane     | other                   |                      |
| solute carrier family 37 (glucose-6-phosphate transporter), member 4                                   | A_51_P385598  | Cytoplasm           | transporter             |                      |
| solute carrier family 38, member 5                                                                     | A_55_P2010641 | Plasma Membrane     | transporter             |                      |
| solute carrier family 4, sodium borate transporter, member 11                                          | A_66_P121976  | Plasma Membrane     | transporter             |                      |
| solute carrier family 6 (neurotransmitter transporter), member 13                                      | A_51_P438083  | Plasma Membrane     | transporter             | tiagabine            |
| solute carrier family 8 (sodium/calcium exchanger), member 2                                           | A_55_P2095563 | Cytoplasm           | transporter             |                      |
| slit homolog 1 (Drosophila)                                                                            | A_55_P1958379 | Extracellular Space | other                   |                      |
| sarcopin                                                                                               | A_52_P413395  | Cytoplasm           | other                   |                      |
| SWI/SNF related, matrix associated, actin dependent regulator of chromatin, subfamily a, member 2      | A_55_P2007802 | Nucleus             | transcription regulator |                      |
| small integral membrane protein 24                                                                     | A_55_P2031403 | Cytoplasm           | other                   |                      |
| sushi, nidogen and EGF-like domains 1                                                                  | A_52_P550147  | Plasma Membrane     | other                   |                      |
| superoxide dismutase 3, extracellular                                                                  | A_55_P2077558 | Extracellular Space | enzyme                  |                      |
| sclerostin domain containing 1                                                                         | A_55_P2158121 | Extracellular Space | other                   |                      |
| SP110 nuclear body protein                                                                             | A_55_P2066792 | Nucleus             | other                   |                      |
| Sp5 transcription factor                                                                               | A_51_P404193  | Nucleus             | other                   |                      |
| sperm associated antigen 7                                                                             | A_55_P2102365 | Nucleus             | other                   |                      |
| serine peptidase inhibitor, Kazal type 1                                                               | A_51_P365516  | Extracellular Space | other                   |                      |

|                                                                          |               |                     |                            |
|--------------------------------------------------------------------------|---------------|---------------------|----------------------------|
| sparc/osteonectin, cwcv and kazal-like domains proteoglycan (testican) 2 | A_52_P221756  | Extracellular Space | other                      |
| secreted phosphoprotein 2, 24kDa                                         | A_55_P2179676 | Extracellular Space | other                      |
| splicing regulatory glutamine/lysine-rich protein 1                      | A_55_P1966372 | Nucleus             | other                      |
| ST3 beta-galactoside alpha-2,3-sialyltransferase 6                       | A_51_P281333  | Cytoplasm           | enzyme                     |
| stabilin 2                                                               | A_55_P1974028 | Plasma Membrane     | transmembrane receptor     |
| six transmembrane epithelial antigen of the prostate 1                   | A_51_P484158  | Plasma Membrane     | transporter                |
| STEAP family member 2, metalloreductase                                  | A_55_P2133315 | Plasma Membrane     | transporter                |
| stromal interaction molecule 1                                           | A_55_P2005982 | Plasma Membrane     | ion channel                |
| stathmin 2                                                               | A_55_P2068673 | Plasma Membrane     | other                      |
| syntaxin binding protein 1                                               | A_55_P2077188 | Cytoplasm           | transporter                |
| sulfotransferase family 1D, member 1                                     | A_55_P2181542 | Cytoplasm           | enzyme                     |
| suppressor of variegation 3-9 homolog 2 (Drosophila)                     | A_55_P2072403 | Nucleus             | transcription regulator    |
| SVOP-like                                                                | A_51_P316902  | Other               | other                      |
| synaptotagmin 1                                                          | A_55_P1955517 | Cytoplasm           | phosphatase                |
| synaptopodin 2-like                                                      | A_55_P1968863 | Cytoplasm           | other                      |
| T-box 3                                                                  | A_55_P1969002 | Nucleus             | transcription regulator    |
| transcription elongation factor A (SII)-like 5                           | A_66_P104980  | Other               | other                      |
| transcription factor 24                                                  | A_55_P2106608 | Other               | other                      |
| t-complex 11, testis-specific-like 2                                     | A_51_P497317  | Other               | other                      |
| teneurin transmembrane protein 4                                         | A_55_P2141088 | Plasma Membrane     | other                      |
| transcription factor EB                                                  | A_55_P1997898 | Nucleus             | transcription regulator    |
| transglutaminase 5                                                       | A_55_P1958487 | Cytoplasm           | enzyme                     |
| threonine synthase-like 2 (S. cerevisiae)                                | A_52_P487599  | Other               | other                      |
| Thy-1 cell surface antigen                                               | A_55_P2072035 | Plasma Membrane     | other                      |
| T-cell lymphoma invasion and metastasis 2                                | A_51_P256066  | Cytoplasm           | enzyme                     |
| tubulointerstitial nephritis antigen                                     | A_51_P283004  | Extracellular Space | peptidase                  |
| transmembrane protein 174                                                | A_51_P492346  | Other               | other                      |
| transmembrane protein 213                                                | A_51_P401501  | Other               | other                      |
| transmembrane protein 239                                                | A_55_P2046253 | Other               | other                      |
| transmembrane protein 25                                                 | A_55_P2126572 | Extracellular Space | other                      |
| transmembrane protein 254c                                               | A_55_P1967553 | Other               | other                      |
| transmembrane protein 27                                                 | A_55_P2042753 | Plasma Membrane     | other                      |
| transmembrane protein 59-like                                            | A_51_P215038  | Cytoplasm           | other                      |
| transmembrane protein 8B                                                 | A_55_P2043932 | Plasma Membrane     | other                      |
| transmembrane protease, serine 3                                         | A_55_P2011151 | Plasma Membrane     | peptidase                  |
| tumor necrosis factor receptor superfamily, member 10a                   | A_55_P2027836 | Plasma Membrane     | transmembrane rec trm-1    |
| tumor necrosis factor receptor superfamily, member 9                     | A_55_P2029061 | Plasma Membrane     | transmembrane rec urelumab |
| troponin I type 1 (skeletal, slow)                                       | A_52_P657360  | Cytoplasm           | other                      |
| trophoblast glycoprotein                                                 | A_55_P2098200 | Plasma Membrane     | other                      |
| TNF receptor-associated factor 1                                         | A_51_P343833  | Cytoplasm           | other                      |
| thyrotropin-releasing hormone                                            | A_55_P2071349 | Extracellular Space | other                      |
| tribbles pseudokinase 3                                                  | A_55_P2009988 | Nucleus             | kinase                     |
| tripartite motif containing 25                                           | A_55_P2098076 | Cytoplasm           | transcription regulator    |
| tetraspanin 17                                                           | A_55_P2067453 | Other               | enzyme                     |
| tweety family member 2                                                   | A_55_P1985768 | Other               | ion channel                |
| tubulin, beta 2B class IIb                                               | A_55_P2034864 | Cytoplasm           | other brentuximab vedoti   |
| twist family bHLH transcription factor 2                                 | A_51_P165504  | Nucleus             | transcription regulator    |
| ubiquitin-conjugating enzyme E2I                                         | A_55_P2326517 | Nucleus             | enzyme                     |
| upstream binding transcription factor, RNA polymerase I                  | A_55_P1992680 | Nucleus             | transcription regulator    |
| UDP glucuronosyltransferase 1 family, polypeptide A6                     | A_55_P1962404 | Cytoplasm           | enzyme                     |
| UDP glucuronosyltransferase 2 family, polypeptide B10                    | A_55_P1977418 | Cytoplasm           | enzyme                     |
| UDP glucuronosyltransferase 2 family, polypeptide B28                    | A_66_P131389  | Cytoplasm           | enzyme                     |
| UNC homeobox                                                             | A_55_P2022241 | Other               | transcription regulator    |
| uracil-DNA glycosylase                                                   | A_55_P2040878 | Nucleus             | enzyme                     |
| ubiquitin specific peptidase 51                                          | A_55_P2176953 | Other               | peptidase                  |
| vesicle amine transport 1-like                                           | A_52_P577533  | Other               | enzyme                     |
| vascular endothelial growth factor C                                     | A_51_P433870  | Extracellular Space | growth factor              |
| villin 1                                                                 | A_52_P260555  | Cytoplasm           | other                      |
| WD repeat and FYVE domain containing 1                                   | A_55_P2092730 | Cytoplasm           | other                      |
| WDFY family member 4                                                     | A_52_P199614  | Other               | other                      |
| WD repeat domain 89                                                      | A_55_P2056280 | Other               | other                      |
| WSC domain containing 2                                                  | A_52_P173442  | Other               | other                      |
| X-prolyl aminopeptidase (aminopeptidase P) 2, membrane-bound             | A_55_P1985950 | Plasma Membrane     | peptidase                  |
| Y box binding protein 2                                                  | A_55_P1973447 | Cytoplasm           | translation regulator      |
| zinc finger, CCHC domain containing 9                                    | A_55_P2146708 | Other               | other                      |
| zinc finger protein 133, pseudogene                                      | A_55_P2161675 | Other               | other                      |
| zinc finger protein 941                                                  | A_55_P2109479 | Other               | other                      |
| zinc finger protein, FOG family member 1                                 | A_55_P2048518 | Nucleus             | transcription regulator    |
| zinc finger protein, FOG family member 2                                 | A_51_P336509  | Nucleus             | transcription regulator    |
| zinc finger, matrin-type 4                                               | A_51_P422685  | Nucleus             | other                      |
| zinc finger protein 512B                                                 | A_55_P2044252 | Nucleus             | other                      |
| zinc finger protein 536                                                  | A_51_P218953  | Other               | other                      |

zinc finger protein 703  
zinc finger, SWIM-type containing 8

A\_66\_P126332 Nucleus other  
A\_55\_P2039180 Extracellular Space other

Entrez Gene ID for Entrez Gene ID for Entrez Gene ID for Rat

|               |                 |               |
|---------------|-----------------|---------------|
|               | 73385 100101807 |               |
|               | 73549           |               |
|               | 100504720       |               |
|               | 69563           |               |
|               | 330635          |               |
|               | 106967          |               |
|               | 381347          |               |
|               | 243900 114675   |               |
|               | 232217          | 685621        |
|               | 99946           |               |
|               | 77207           |               |
|               | 71512           |               |
|               | 105892          |               |
|               | 108858          |               |
|               | 319610          |               |
|               | 399612          |               |
|               | 380787          | 500724        |
|               | 381384          |               |
| 26027         | 329910          | 100363074     |
| 8310          | 80911           | 83522         |
| <b>123876</b> | <b>233799</b>   | <b>246263</b> |
| 55902         | 60525           | 311569        |
| 170691        | 233332          | 293004        |
| 11173         | 108153          | 315879        |
| 174           | 11576           | 24177         |
| <b>8644</b>   | <b>105349</b>   | <b>171516</b> |
| 8854          | 19378           | 116676        |
| 220           | 56847           | 266603        |
| <b>229</b>    | <b>230163</b>   | <b>24190</b>  |
| 81693         | 93835           | 314459        |
| 56172         | 11732           | 114506        |
| <b>312</b>    | <b>69787</b>    | <b>362915</b> |
| 333           | 11803           | 502317        |
| 23092         | 71302           | 307459        |
| 22899         | 442801          | 287418        |
| 151188        | 65103           | 499798        |
| 408           | 109689          | 25387         |
| 420           | 109978          | 312806        |
| 140462        | 69299           | 367785        |
| 55515         | 241118          | 63882         |
| 374569        | 104816          | 246266        |
| 445           | 11898           | 25698         |
| 481           | 11931           | 25650         |
| 155066        | 76252           | 436582        |
| 6314          | 246103          | 361015        |
|               | 105332          |               |
|               | 100993          |               |
| 60468         | 12014           | 313125        |
| 622           | 71911           | 117099        |
| 389206        | 666938          | 681008        |
| 254240        | 270757          | 299685        |
| 1620          | 56710           | 140610        |
| <b>7809</b>   | <b>140475</b>   | <b>192675</b> |
| 696           | 12231           | 306956        |
| 219738        | 69894           | 685881 294499 |
| 728568        | 544717          | 691921        |
| 79630         | 229600          |               |
| 717           | 12263           | 24231         |
|               | 414098          |               |
| 27202         | 319430          | 445269        |
| 79095         | 73737           | 499780        |
| 762           | 12351           | 29242         |
| 793           | 12307           | 83839         |
| 91860         | 75600           | 691455        |
| 83698         | 140904          | 363909        |
| 84254         | 55984           | 60341         |
| 827           | 12338           | 83685         |
| 165055        | 76138           | 499442        |
| 148170        | 58804           | 361505        |
| 1004          | 12563           | 25409         |

|              |                            |                 |
|--------------|----------------------------|-----------------|
| 8851         | 12569                      | 116671          |
| 8814         | 71091                      | 314198          |
| 56853        | 108013                     |                 |
| 283638       | 217882                     | 500726          |
| 10669        | 68567                      | 245918          |
| 128866       | 75608                      | 679886          |
| 54480        | 100910                     | 296733          |
| 64377        | 68947                      | 308511          |
| <b>1149</b>  | <b>12683</b>               | <b>291541</b>   |
| 27141        | 12684                      | 364388          |
| <b>4435</b>  | <b>12705</b>               | <b>64466</b>    |
| <b>1187</b>  | <b>56365</b>               | <b>79430</b>    |
| 497190       | 353287                     | 307851          |
| 54102        | 209195                     | 304081          |
| 1277         | 12842                      | 29393           |
| 136227       | 140709                     | 685612          |
| 1280         | 12824                      | 25412           |
| 1288         | 94216                      | 363458          |
| 1289         | 12831                      | 85490           |
| 1294         | 12836                      | 301012          |
| 8292         | 382864                     | 29755           |
| 125965       | 333182                     | 654441          |
| 1357         | 109697                     | 24269           |
| 1358         | 232680                     | 296959          |
| 1361         | 56373                      | 113936          |
| 1369         | 93721                      | 365466          |
| 1382         | 12904                      |                 |
| 286204       | 241324                     | 366031          |
| 9586         | 231991                     | 500131          |
| 1400         | 12933                      | 25415           |
| 10675        | 29873                      | 50568           |
| <b>8029</b>  | <b>65969</b>               | <b>80848</b>    |
| 1534         | 13056                      | 303601          |
| 51167        | 266690                     | 171015          |
| 56603        | 232174                     | 312495          |
|              | 76279                      | 25053           |
| 113612       | 71519                      | 310848          |
| 1579         | 666168 100040843           | 50549           |
|              | 399607                     |                 |
|              | 320216                     |                 |
|              | 268595                     | 100909954       |
|              | 52186                      |                 |
| 1610         | 13142                      | 114027          |
| 92196        | 76747                      | 362136          |
| 340578       | 245403                     | 298159          |
| 1641         | 13193                      | 84394           |
| 51181        | 67880                      | 171408          |
| 1644         | 13195                      | 24311           |
| 10260        | 102442                     | 315756          |
| 51071        | 232449                     | 690945          |
| 27122        | 50781                      | 171548          |
| 58512        | 242667                     | 286923          |
| 8788         | 13386                      | 114587          |
| <b>28514</b> | <b>13388</b>               | <b>84010</b>    |
| 2039         | 13829                      | 361069          |
| 55466        | 58233                      | 300721          |
| 131118       | 100503724 67713            |                 |
| 79962        | 72778                      | 362998          |
| 80005        | 68813                      | 305987          |
| 8193         | 29861                      | 50545           |
| 1803         | 13482                      | 25253           |
| 56896        | 65254                      | 100910964 65208 |
|              | 100039293 278672 100039227 |                 |
| 1780         | 13426                      | 29564           |
|              | 13607                      | 302424          |
| 1956         | 13649                      | 24329           |
| 79813        | 77683                      | 362078          |
|              | 26908                      |                 |
|              | 13711                      | 366142          |
| 84034        | 246707                     | 316736          |
| 284131       | 338371                     |                 |
| 2026         | 13807                      | 100911625 24334 |



|           |                            |        |
|-----------|----------------------------|--------|
| 2028      | 13809                      | 64017  |
| 54566     | 54357                      | 500464 |
| 2044      | 13839                      | 79208  |
| 2049      | 13845                      | 287989 |
| 2052      | 13849                      | 25315  |
| 2059      | 13860                      | 312812 |
| 83715     | 56226                      | 56227  |
| 2104      | 26381                      | 360896 |
| 54536     | 107371                     | 50556  |
| 5393      | 50911                      | 294975 |
| 2138      | 14048                      | 502935 |
| 2170      | 14077                      | 79131  |
| 64760     | 239170                     | 306015 |
| 203259    | 71901                      | 691024 |
| 2200      | 14118                      | 83727  |
| 2203      | 14121                      | 24362  |
| 146330    | 214931                     | 494223 |
| 23194     | 448987                     | 361907 |
| 23149     | 74015                      |        |
| 89848     | 319262                     | 307482 |
| 2244      | 110135                     | 24366  |
| 2246      | 14164                      | 25317  |
| 9896      | 103199                     | 309855 |
| 23769     | 396184                     | 499308 |
| 23767     | 71436                      | 366205 |
| 2335      | 14268                      | 25661  |
| 23048     | 14269                      | 192348 |
| 2348      | 14275                      | 171049 |
| 2297      | 15229                      | 171299 |
| 2299      | 14233                      | 287185 |
| 100132074 | 329934                     | 313558 |
| 116113    | 74123                      | 363185 |
| 158326    | 329872                     | 298185 |
| 143162    | 268729                     | 498583 |
| 2487      | 20378                      | 295691 |
| 10468     | 14313                      | 24373  |
|           | 11936                      |        |
| 11211     | 93897                      | 363913 |
| 2556      | 14396                      | 24947  |
| 51083     | 14419                      | 29141  |
| 84253     | 99326                      | 499783 |
| 729438    | 80909                      | 304410 |
| 2638      | 14473                      | 24384  |
| 2650      | 14537                      | 64043  |
| 2675      | 14586                      | 25136  |
| 2676      | 14587                      | 84422  |
| 2678      | 14598                      | 116568 |
| 54810     | 54120                      | 365960 |
| 2717      | 11605                      | 363494 |
|           | 100038646                  |        |
|           | 237769                     |        |
|           | 15289 100862258            | 679571 |
|           | 212539                     | 366733 |
|           | 329055 668106              | 294097 |
|           | 382421                     |        |
|           | 619937                     | 497907 |
|           | 621335                     |        |
|           | 629678                     |        |
|           | 100039175 100039246 211623 |        |
|           | 100038519                  |        |
| 10681     | 14697                      | 83579  |
| 2788      | 14708                      | 58979  |
| 2819      | 14555                      | 60666  |
| 9737      | 67298                      | 171407 |
| 2893      | 14802                      | 29629  |
| 221357    | 100042314 100042           | 494499 |
| 2949      | 14862                      | 24423  |
|           | 14867                      | 499688 |
| 51454     | 70676                      | 314543 |
| 727936    | 232313                     | 688618 |
|           | 630499 110558              |        |
|           | 15016                      |        |

|        |                                                                                                        |           |
|--------|--------------------------------------------------------------------------------------------------------|-----------|
| 3029   | 14651                                                                                                  | 24439     |
| 9001   | 15114                                                                                                  | 29430     |
| 3037   | 15117                                                                                                  | 25694     |
| 3067   | 15186                                                                                                  | 24443     |
| 374659 | 68695                                                                                                  | 308758    |
| 23072  | 94253                                                                                                  | 291209    |
| 55363  | 93966                                                                                                  | 113882    |
| 388585 | 15208                                                                                                  | 79225     |
| 23462  | 15213                                                                                                  | 155437    |
| 64399  | 15245                                                                                                  | 291936    |
| 3105   | 667977 15013 150( 24973 414779 414783 368153 414793 414819 309607 309603 414792 414790 100364500 24974 |           |
| 3133   | 667803 15040                                                                                           | 294228    |
| 51617  | 18197                                                                                                  | 497878    |
| 6927   | 21405                                                                                                  | 24817     |
| 3172   | 15378                                                                                                  | 25735     |
| 3221   | 15423                                                                                                  | 24459     |
| 3238   | 15432                                                                                                  | 366082    |
| 3233   | 15436                                                                                                  | 288153    |
| 51171  | 66065                                                                                                  | 691018    |
|        | 15495 100043461  24470 100911116                                                                       |           |
|        | 619313                                                                                                 |           |
|        | 74482                                                                                                  |           |
| 9543   | 19289                                                                                                  | 315759    |
| 57722  | 56741                                                                                                  | 363081    |
| 3484   | 16006                                                                                                  | 25685     |
| 3601   | 16169                                                                                                  | 690369    |
| 90865  | 77125                                                                                                  | 361749    |
| 55705  | 226432                                                                                                 | 304817    |
| 79192  | 16371                                                                                                  | 306659    |
| 80760  | 209378                                                                                                 |           |
| 3706   | 228550                                                                                                 | 81677     |
| 6453   | 16443                                                                                                  | 29491     |
| 23338  | 76901                                                                                                  | 303113    |
| 25959  | 235041                                                                                                 | 100361376 |
| 81621  | 107250                                                                                                 | 293997    |
| 3739   | 16492                                                                                                  | 25469     |
| 3751   | 16508                                                                                                  | 65180     |
| 3758   | 56379                                                                                                  | 24521     |
| 375616 | 333088                                                                                                 | 296952    |
| 57613  | 74525                                                                                                  | 362455    |
| 547    | 16560                                                                                                  | 363288    |
| 23046  | 16565                                                                                                  | 289397    |
| 3800   | 16574                                                                                                  | 311024    |
| 90990  | 16581                                                                                                  | 300053    |
| 64837  | 16594                                                                                                  | 309159    |
| 8689   | 16673                                                                                                  | 287698    |
| 9215   | 16795                                                                                                  |           |
| 9079   | 16826                                                                                                  | 289664    |
| 143458 | 241576                                                                                                 | 366138    |
| 3975   | 16869                                                                                                  | 257634    |
| 3984   | 16885                                                                                                  | 65172     |
|        | 102635467                                                                                              |           |
|        | 102638978                                                                                              |           |
|        | 102641046                                                                                              |           |
|        | 102641638                                                                                              |           |
| 9663   | 64898                                                                                                  | 316737    |
| 84918  | 237253                                                                                                 | 292462    |
| 4036   | 14725                                                                                                  | 29216     |
|        | 320352                                                                                                 |           |
| 94030  | 272381                                                                                                 | 308571    |
| 51631  | 192196                                                                                                 | 312251    |
|        | 57248 546644 110( 300024 362935 503162 56778 100911104 246138                                          |           |
| 9450   | 17084                                                                                                  | 291359    |
| 11178  | 211134                                                                                                 | 266711    |
| 8567   | 228355                                                                                                 | 94193     |
| 9935   | 16658                                                                                                  | 54264     |
| 378938 | 72289                                                                                                  |           |
| 57787  | 232944                                                                                                 | 680407    |
| 115004 | 214763                                                                                                 | 682147    |
| 4152   | 17190                                                                                                  | 291439    |
| 4162   | 84004                                                                                                  | 78967     |
| 55784  | 244049                                                                                                 | 308742    |

|               |                   |                  |
|---------------|-------------------|------------------|
| 4188          | 17240             | 501097           |
| 10873         | 109264            | 361602           |
| 84935         | 70717             | 360757           |
| 4205          | 17258             | 309957           |
|               | 17263             |                  |
| <b>4223</b>   | <b>17286</b>      | <b>29279</b>     |
| 4224          | 17287             | 25684            |
| 4225          | 17288             | 25727            |
| 10724         | 76055             | 154968           |
| 142678        | 76580             | 474147           |
|               | 380732            | 59105            |
| 4291          | 17349             | 310483           |
| 51085         | 58805             | 171078           |
| 253714        | 212377            | 313108           |
| 4330          | 433938            | 498194           |
|               | 64380 66607 60361 |                  |
| 113115        | 71804             | 100911069        |
| <b>4609</b>   | <b>17869</b>      | <b>24577</b>     |
| 4625          | 140781            | 29557            |
| 89796         | 215690            | 685707           |
| 4691          | 17975             | 25135            |
| 27158         | 78797             | 311799           |
| 65009         | 234593            | 64457            |
| 51497         | 57314             | 679203           |
| 4745          | 338352            | 81733            |
| 54492         | 240055            | 303019           |
| 4781          | 18028             | 29227            |
| 8382          | 75533             | 688903           |
| 256933        | 208990            | 259222           |
|               | 504193            |                  |
| <b>7827</b>   | <b>170484</b>     | <b>170672</b>    |
| 140767        | 22360             | 291129           |
| 51559         | 103466            | 691922           |
| 4923          | 18216             | 366274           |
| 11248         | 104079            | 59315            |
| 654231        | 18261             | 25503            |
| 55239         | 270086            | 307657           |
| <b>116039</b> | <b>107587</b>     | <b>315039</b>    |
| 10298         | 70584             | 292756           |
| 64282         | 214627            | 307745           |
| 54852         | 74090             | 315741           |
| 79957         | 68957             | 681021           |
| 56288         | 93742             | 81918            |
| 5071          | 50873             | 56816            |
| 64081         | 68371             | 171564 100360692 |
| <b>5087</b>   | <b>18514</b>      | <b>304947</b>    |
| 27253         | 219228            | 306055           |
| 57526         | 279653            | 317183           |
| 5100          | 18530             | 64865            |
| 27445         | 26875             | 56768            |
| 5121          | 18546             | 25510            |
| 5126          | 18549             | 25121            |
| 255738        | 100102            | 298296           |
| 5162          | 68263             | 289950           |
| 54704         | 381511            | 54705            |
| 5174          | 59020             | 65144            |
| 79834         | 244895            | 315686           |
| 64065         | 64058             | 292949           |
| 283209        | 70974             | 685076           |
| 51604         | 78928             | 296360           |
| 51268         | 19193             | 303272           |
| 26030         | 263406            | 314249           |
| 10687         | 239157            | 305977           |
| 25913         | 101185            | 500054           |
|               | 18991             |                  |
|               | 68507             | 140592           |
| 152926        | 243382            | 312381           |
| 23368         | 21981             | 314465           |
| 79660         | 244416            | 192280           |
| 5578          | 18750             | 24680            |
| 5579          | 18751             | 25023            |

56868|243862|26438|72242|26437|434540|114871|114868|574429|26439|545925

|           |                   |           |
|-----------|-------------------|-----------|
| 10197     | 19192             | 287716    |
| 84867     | 19259             | 29644     |
| 5800      | 19277             | 50677     |
| 5802      | 19280             | 25529     |
| 23475     | 67375             | 293504    |
| 140902    | 100043899         | 366245    |
| 5865      | 69908             | 81755     |
| 339122    | 69834             | 500249    |
| 5889      | 114714            | 497976    |
| 9649      | 241308            | 100361774 |
| 54715     | 268859            | 302920    |
| 54502     | 245945            | 305340    |
| 5979      | 19713             | 24716     |
| 6001      | 67865             | 54290     |
| 284716    | 194237            |           |
| 9783      | 242662            | 65025     |
| 54453     | 74030             | 311494    |
| 11035     | 56532             | 246240    |
| 134701    | 382089            | 363111    |
| 6038      | 58809             | 56759     |
| 57674     | 672511            | 303735    |
| 6092      | 268902            | 84409     |
| 4920      | 26564             | 306782    |
| 9501      | 380714            | 171123    |
| 89765     | 22092             | 361818    |
| 64108     | 67775             | 360733    |
| 862       | 12395             | 362489    |
| 795       | 12309             | 24249     |
| 100316904 | 751865            | 288559    |
| 6334      | 20273             | 29710     |
|           | 20287             | 24769     |
| 80274     | 64706             | 315174    |
| 642658    | 20289             | 680712    |
| 54910     | 20353             | 301346    |
| 57715     | 26456             | 361764    |
| 10500     | 20360             | 29744     |
| 80031     | 214968            | 311384    |
| 55964     | 24050             | 56003     |
| 5265      | 20703 20704 2070; | 24648     |
| 5271      | 20725             | 288937    |
| 5345      | 18816             | 287527    |
| 10110     | 27219             | 171497    |
| 6448      | 27029             |           |
| 387914    | 219134            | 498528    |
| 8631      | 78473             | 286975    |
|           | 639774 328505     | 689792    |
| 8170      | 27411             | 54302     |
| 6509      | 55963             | 305540    |
| 9356      | 18399             | 29509     |
| 151295    | 22626             | 367298    |
| 284129    | 268512            | 360670    |
| 222962    | 243328            | 288499    |
|           | 329584            |           |
| 140679    | 22348             | 83612     |
| 6569      | 20505             | 25548     |
| 159371    | 240660            | 294072    |
| 2542      | 14385             | 29573     |
| 92745     | 209837            | 192208    |
| 83959     | 269356            | 311423    |
| 6540      | 14412             | 171163    |
| 6543      | 110891            | 140447    |
| 6585      | 20562             | 65047     |
| 6588      | 66402             |           |
| 6595      | 67155             | 361745    |
| 284422    | 72273             | 100366121 |
| 25992     | 208777            | 316638    |
| 6649      | 20657             | 25352     |
| 25928     | 66042             | 266803    |
| 3431      | 109032 546061 62; | 301570    |
| 389058    | 64406             | 296510    |
| 9552      | 216873            | 303260    |
| 6690      | 20730             |           |

|           |                           |           |
|-----------|---------------------------|-----------|
| 9806      | 94214                     | 361840    |
| 6694      | 75396                     | 94168     |
| 140890    | 218543                    | 56763     |
| 10402     | 54613                     | 304023    |
| 55576     | 192188                    | 282580    |
| 26872     | 70358                     | 297738    |
| 261729    | 74051                     | 312052    |
| 6786      | 20866                     | 361618    |
| 11075     | 20257                     | 84510     |
| 6812      | 20910                     | 25558     |
|           | 53315                     | 60393     |
| 79723     | 64707                     | 364785    |
| 136306    | 320590                    | 500085    |
| 8867      | 104015                    | 85238     |
| 79933     | 68760                     | 305675    |
| 6926      | 21386                     | 353305    |
| 340543    | 331532                    | 680282    |
| 100129654 | 100039596                 | 680678    |
| 255394    | 216198                    | 314683    |
| 26011     | 23966                     | 308831    |
| 7942      | 21425                     | 316214    |
| 9333      | 74176                     | 691932    |
| 55258     | 232078                    | 297332    |
| 7070      | 21838                     | 24832     |
| 26230     | 24001                     | 100362710 |
| 27283     | 26944                     | 300846    |
| 134288    | 68344                     | 499516    |
| 155006    | 77522                     | 689748    |
| 100288797 | 66766                     | 688109    |
| 84866     | 71687                     | 689172    |
|           | 100039257 66039 100039192 |           |
| 57393     | 57394                     | 57395     |
| 25789     | 67937                     | 306349    |
| 51754     | 242409                    | 313490    |
| 64699     | 140765                    | 309665    |
| 8797      | 21933                     | 364420    |
| 3604      | 21942                     | 500590    |
| 7135      | 21952                     | 29388     |
| 7162      | 21983                     | 83684     |
| 7185      | 22029                     | 687813    |
| 7200      | 22044                     | 25569     |
| 57761     | 228775                    | 246273    |
| 7706      | 217069                    | 494338    |
| 26262     | 74257                     | 306771    |
| 94015     | 117160                    | 287803    |
| 347733    | 73710                     | 291081    |
| 117581    | 13345                     | 59327     |
| 7329      | 22196                     | 25573     |
| 7343      | 21429                     | 25574     |
| 54578     | 94284 394435              | 113992    |
| 7365      | 100727                    | 305264    |
| 54490     | 22238 100559 1124         | 24862     |
| 340260    | 22255                     | 29375     |
| 7374      | 22256                     | 304577    |
| 158880    | 635253                    | 317398    |
| 57687     | 270097                    | 361414    |
| 7424      | 22341                     | 114111    |
| 7429      | 22349                     | 316521    |
| 57590     | 69368                     |           |
| 57705     | 545030                    | 498582    |
| 112840    | 72338                     | 314243    |
| 9671      | 320916                    | 360824    |
| 7512      | 170745                    | 117522    |
| 51087     | 53422                     | 303250    |
| 84240     | 69085                     | 309986    |
|           | 668917                    |           |
|           | 407812                    |           |
| 161882    | 22761                     | 691504    |
| 23414     | 22762                     | 314930    |
| 79698     | 320158                    | 684961    |
| 57473     | 269401                    | 311721    |
| 9745      | 243937                    | 292820    |

|       |        |        |
|-------|--------|--------|
| 80139 | 353310 | 680717 |
| 23053 | 268721 | 361004 |



Table S2. Microarray and nanostring data

| Gene Symbol | Microarray<br>Expression<br>FC           | Nanostring<br>Expression<br>FC | qRT-PCR<br>Expression<br>FC | IF | ISH |
|-------------|------------------------------------------|--------------------------------|-----------------------------|----|-----|
|             | <b>p&lt;0.05 highlighted in Red font</b> |                                |                             |    |     |
| Cited1      | -6.016                                   | -8.828                         |                             |    |     |
| Cox6b2      | 1.653                                    | 1.854                          |                             |    |     |
| Pdgfra      | 1.417                                    | 2.352                          |                             |    |     |
| Col1a1      | 1.53                                     | 1.612                          |                             |    |     |
| Slc16a2     | 1.452                                    | 1.867                          |                             |    |     |
| Col6a1      | 1.418                                    | 1.783                          |                             |    |     |
| Col6a2      | 1.408                                    | 1.768                          |                             |    |     |
| Odc1        | 1.352                                    | -1.150                         |                             |    |     |
| Col1a2      | 1.376                                    | 1.483                          |                             |    |     |
| Pck1        | -6.002                                   | 1.333                          |                             |    |     |
| Tbp         | 1.192                                    | 1.356                          |                             |    |     |
| Idh1        | #N/A                                     | -1.318                         |                             |    |     |
| Col6a3      | #N/A                                     | 1.924                          |                             |    |     |
| Meox1       | #N/A                                     | -1.907                         |                             |    |     |
| Cyp2s1      | #N/A                                     | 1.418                          |                             |    |     |
| Igfbp6      | #N/A                                     | 1.559                          |                             |    |     |
| Pgm1        | #N/A                                     | 1.466                          |                             |    |     |
| Cyp4a10     | #N/A                                     | -1.943                         |                             |    |     |
| Rras        | #N/A                                     | 1.540                          |                             |    |     |
| Cyp2d26     | #N/A                                     | -1.379                         |                             |    |     |
| Aldob       | #N/A                                     | -1.554                         |                             |    |     |
| B2m         | #N/A                                     | 1.376                          |                             |    |     |
| Osr1        | #N/A                                     | 1.727                          |                             |    |     |
| Fbp1        | #N/A                                     | -1.879                         |                             |    |     |
| Alas1       | #N/A                                     | 1.170                          |                             |    |     |
| Arhgap5     | #N/A                                     | 1.270                          |                             |    |     |
| Tbx2        | #N/A                                     | 1.357                          |                             |    |     |
| Gpd2        | #N/A                                     | -1.236                         |                             |    |     |
| Pck2        | #N/A                                     | 1.263                          |                             |    |     |
| Ctgf        | #N/A                                     | -1.411                         |                             |    |     |
| Gpd1        | #N/A                                     | -1.395                         |                             |    |     |
| Ppp1r14a    | #N/A                                     | 1.948                          |                             |    |     |
| Elf4        | #N/A                                     | 1.578                          |                             |    |     |
| Mef2c       | #N/A                                     | 1.277                          |                             |    |     |
| Ogdh        | #N/A                                     | 1.128                          |                             |    |     |
| Fgfr4       | #N/A                                     | -1.280                         |                             |    |     |
| Fgf1        | #N/A                                     | -1.825                         |                             |    |     |
| Ntrk1       | #N/A                                     | 1.954                          |                             |    |     |

|          |      |        |  |  |  |
|----------|------|--------|--|--|--|
| Eno1     | #N/A | 1.075  |  |  |  |
| Pdgfrb   | #N/A | 1.264  |  |  |  |
| Aldoa    | #N/A | 1.118  |  |  |  |
| Socs2    | #N/A | 1.542  |  |  |  |
| Trp53    | #N/A | 1.143  |  |  |  |
| Bmp2     | #N/A | 1.262  |  |  |  |
| Ldha     | #N/A | 1.100  |  |  |  |
| Six2     | #N/A | 1.064  |  |  |  |
| Mapkapk3 | #N/A | 1.307  |  |  |  |
| Atp5j2   | #N/A | 1.057  |  |  |  |
| Igfbp3   | #N/A | -1.165 |  |  |  |
| H6pd     | #N/A | 1.091  |  |  |  |
| Acta2    | #N/A | 1.168  |  |  |  |
| Cdkn1a   | #N/A | 1.326  |  |  |  |
| Chrd     | #N/A | 1.577  |  |  |  |
| Pax2     | #N/A | 1.108  |  |  |  |
| Tpi1     | #N/A | 1.271  |  |  |  |
| Cldn5    | #N/A | 1.072  |  |  |  |
| Gm5506   | #N/A | 1.361  |  |  |  |
| Hprt     | #N/A | 1.077  |  |  |  |
| Ndufs5   | #N/A | 1.061  |  |  |  |
| Igfbp7   | #N/A | -1.030 |  |  |  |
| Pklr     | #N/A | -1.133 |  |  |  |
| Aldoc    | #N/A | 1.109  |  |  |  |
| Rps6ka3  | #N/A | 1.025  |  |  |  |
| Pfkl     | #N/A | 1.065  |  |  |  |
| Sgk1     | #N/A | 1.030  |  |  |  |
| Cldn6    | #N/A | 1.013  |  |  |  |
| Atp5j    | #N/A | -1.006 |  |  |  |
| Pgk1     | #N/A | 1.010  |  |  |  |
| Gapdh    | #N/A | -1.000 |  |  |  |
